# Supplementary material for: Evaluating the effect of measles and rubella mass vaccination campaigns on seroprevalence in India: a before-and-after cross-sectional household serosurvey in four districts, 2018–2020
Source: PubMed Central journal article supplement (PMC9579355; doi:10.1016/s2214-109x(22)00379-5), 2022-10-11
Supplement: mmc1.pdf [file mmc1.pdf]

# THE LANCET

## Global Health

### Supplementary appendix

This appendix formed part of the original submission and has been peer reviewed. We post it as supplied by the authors.

Supplement to: Murhekar MV, Gupta N, Hasan AZ, et al. Evaluating the effect of measles and rubella mass vaccination campaigns on seroprevalence in India: a before-and-after cross-sectional household serosurvey in four districts, 2018–2020. *Lancet Glob Health* 2022; **10**: e1655–64.

**SUPPLEMENTARY APPENDIX**

SUPPLEMENT TO:

**Evaluating the effect of measles and rubella mass vaccination campaigns on seroprevalence in India: a before-and-after cross-sectional household serosurvey in four districts, 2018–2020**

**Table of Contents****Page No.****Supplementary methods**

1. Figure 1: Map of India showing the districts selected for estimating seroprevalence of measles and rubella (MR) before and after MR supplementary Immunization Activities, 2018-2020.....3
2. Table 1: MRCV-SIA, Pre- and Post-SIA serosurvey dates by district .....4
3. Supplementary methods.....5
4. Measles IgG antibody quantitative adjustment.....6-10

**Supplementary results**

5. Figure 2: Flowchart describing the enrolment of participants in the pre and post-SIA serosurveys in Hoshiarpur, Punjab (A), Dibrugarh, Assam (B), Palghar, Maharashtra (C) and Kanpur Nagar, Uttar Pradesh (D) districts.....11-14
6. Table 2: Characteristics of participants among children aged 9 months to <5 years, by district.....15-16
7. Table 3: Characteristics of participants among children aged 5 to <15 years by district.....17-18
8. Table 4: Weighted seroprevalence (%) of IgG antibodies against measles before and after MR vaccine SIA by selected characteristics among children aged between 9 months and 5 years, 2018-20.....19
9. Table 5: Seropositivity against measles by number of MCV doses received.....20
10. Table 6: Weighted seroprevalence (%) of IgG antibodies against measles before and after MR vaccine SIA by selected characteristics among children aged 5 to <15 years, 2018-20.....21
11. Table 7: Weighted seroprevalence (%) of IgG antibodies against rubella before and after MR vaccine SIA by selected characteristics among children aged 9 months to < 5 years, 2018-20.....22
12. Table 8: Weighted seroprevalence (%) of IgG antibodies against rubella before and after MR vaccine SIA by selected characteristics among children aged 5 to <15 years, 2018-20.....23
13. Table 9: Number (%) of sera samples with equivocal results.....24
14. Table 10: Overall seroprevalence (%) of IgG antibodies against measles and rubella before and after MR vaccine SIA among considering equivocal samples as test negative.....25
15. Table 11: Factors associated with seronegative status against measles or rubella among children aged 9 months to <5 years in post-SIA survey, 2018-2020.....26-27
16. Table 12: Factors associated with seronegative status against measles or rubella among children aged 5 years to <15 years in post-SIA survey, 2018-2020.....28-29
17. Table 13: Factors associated with seronegative status against measles or rubella among children aged 9 months to <5 years in pre-SIA survey, 2018-2020.....30-31
18. Table 14: Factors associated with seronegative status against measles or rubella among children aged 5 years to <15 years in pre-SIA survey, 2018-2020.....32-33
19. Table 15: Summary of risk factors associated with measles and rubella seronegativity in pre and post SIA serosurveys.....34
20. Table 16: Children age 12-23 months who have received measles vaccine (%) in the surveyed districts from National Family Health Surveys.....35
21. Table 17: Comparison of predicted seroprevalence from the MCV coverage estimates and observed seroprevalence estimated during post-SIA serosurvey.....36
22. STROBE Checklist.....37

1. **Figure 1: Map of India showing the districts selected for estimating seroprevalence of measles and rubella (MR) before and after MR supplementary Immunization Activities, 2018-20**

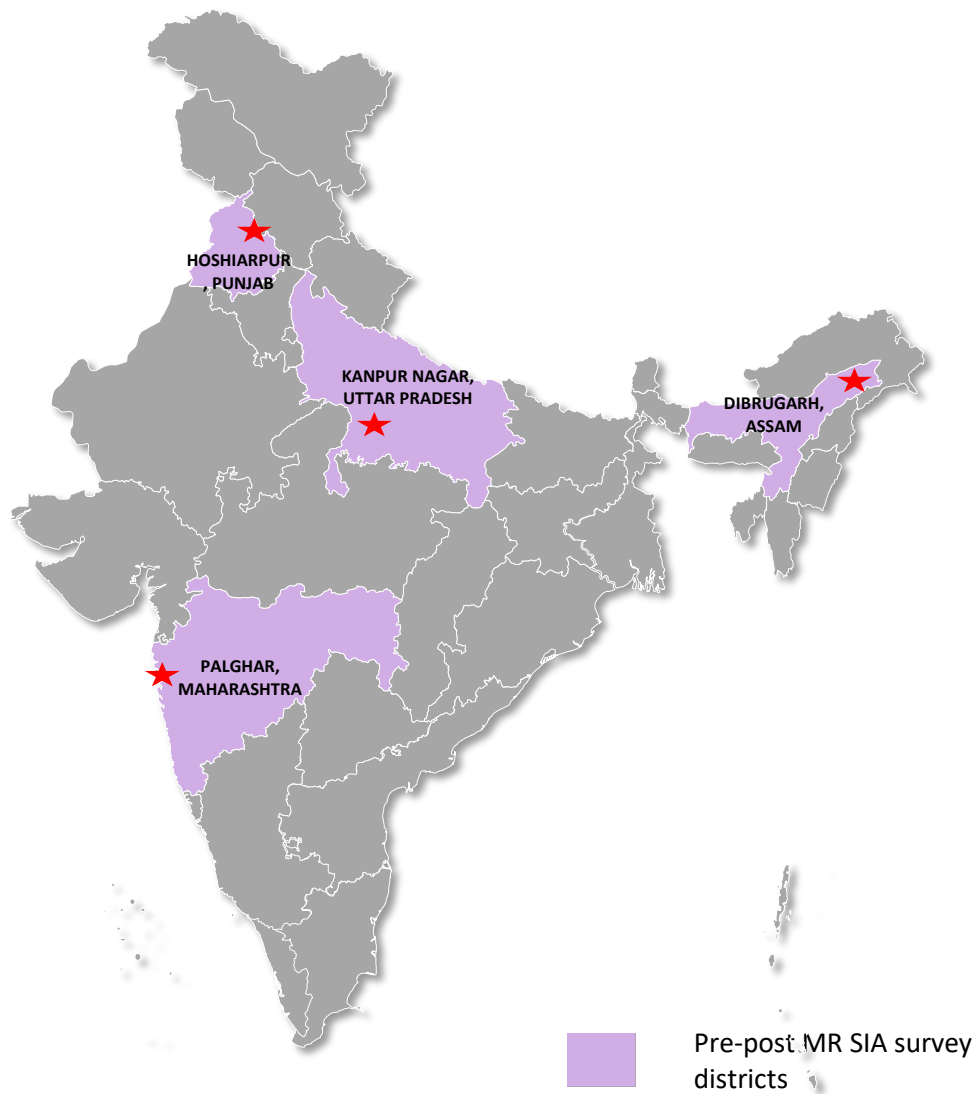

**2. Table 1: Measles Rubella Supplementary Immunization Activity, Pre- and Post-SIA serosurvey dates by district**

| S.No. | Name of the district, state | MR SIA                      | Pre-SIA serosurvey    | Post-SIA serosurvey           | Interval between Pre-campaign survey and SIA (in months) <sup>a</sup> | Interval between SIA and post campaign survey (in months) <sup>b</sup> |
|-------|-----------------------------|-----------------------------|-----------------------|-------------------------------|-----------------------------------------------------------------------|------------------------------------------------------------------------|
| 1     | Hoshiarpur, Punjab          | May 1 – July 31, 2018       | Mar 9 – Apr 16, 2018  | Aug 31 – Dec 2, 2019          | 0.5-2                                                                 | 13-16                                                                  |
| 2     | Dibrugarh, Assam            | Aug 20 – Oct 31, 2018       | Mar 23 – Apr 14, 2018 | Oct 19, 2019 – March 19, 2020 | 4-5                                                                   | 12-14                                                                  |
| 3     | Kanpur Nagar, Uttar Pradesh | Nov 26, 2018 – Feb 28, 2019 | May 10 – Aug 10, 2018 | Jun 1 – Sep 21, 2019          | 1-4                                                                   | 3-6                                                                    |
| 4     | Palghar, Maharashtra        | Nov 27, 2018 – Jan 28, 2019 | Aug 6 – Sep 25, 2018  | Apr 26 – Jun 19, 2019         | 2-4                                                                   | 3-5                                                                    |

<sup>a</sup>Approximate time between pre-SIA survey and campaign based on pre-SIA survey start date (minimum) and stop date (maximum) and the date of the campaign was started

<sup>b</sup>Approximate time between campaign and post-SIA survey based on approximate district-level campaign start date (minimum) and stop date (maximum) and the date the serosurvey was started.

### 3. Supplementary methods

**Study procedures:** The survey team first identified the CEB with the help of local health workers using the census maps procured from the regional census offices. Wherever census maps were not available or did not have clear landmarks, Anganwadi centers were used instead of CEBs. One Anganwadi center caters to a population of 300-800 to provide basic nutrition, health, and early education services. We listed the Anganwadi centers in the village/ward and randomly selected one Anganwadi center as an alternative to the CEB. After identifying the selected CEB and its boundaries, the team conducted a rapid mapping exercise to count the number of households and assessed if segmentation of the CEB was needed. A threshold of 70 households was set to ensure at least 13 individuals per age group were present in the study cluster. This threshold was based on birth rates, infant mortality ratio, and household size. If there were 70-140 households in the cluster, no segmentation was done. If there were more than 140 households, the cluster was segmented, and one segment was randomly selected by an independent statistician at ICMR-National Institute of Epidemiology, Chennai. We followed census definitions to classify the clusters as rural, urban slum and urban non-slums. **Urban:** a) Statutory town - All places with a municipality, corporation, cantonment board or notified town area committee, etc. b) Census town - All other places which satisfied the following criteria: (i) A minimum population of 5,000 (ii) At least 75 percent of the male main workers engaged in non-agricultural pursuits; and (iii) A density of population of at least 400 per sq. km. **Rural:** All areas which are not categorized as urban area are considered as rural area.<sup>1</sup> **Urban Slum:** (i) House located in specified areas in a town or city notified/recognized as slum by state or local government and union territory administration (or) (ii) House part of a compact area of at least 300 population or about 60-70 households of poorly built congested tenements, in an unhygienic environment with inadequate infrastructure and lacking in proper sanitary and drinking water facilities.<sup>2</sup> The survey team enumerated all individuals in the households in the study cluster. Identification details of all individuals who stayed in the house the previous night, including name, date of birth or age, gender, and availability for next 3 days, were collected using a tablet-based application.

**Statistical Analysis:** The sampling weight was calculated as the inverse of the product of selection probabilities of clusters (village or ward), segment, and individuals, corrected for non-response. Seroprevalence by sex and locality (rural/urban, non-slum and slum) was estimated using a similar model without weights. We did logistic regression to identify factors associated with seronegativity against measles or rubella after the MR-SIAs. Odds ratios (with 95%CI) were adjusted for sex, religion, mother's education or mother's occupation, type of residence or house, type of toilet provision, number of vaccine doses received, MR campaign dose coverage and district.

We used semiparametric models with penalized regression smoothers to estimate measles and rubella seropositivity by age. We selected the 'best' penalized regression spline between two spline basis functions (cubic regression spline, and thin plate regression spline) and two link functions (logit and complementary log-log), by minimizing Bayesian Information Criteria (BIC) for measles and rubella by district. The choice of the basis dimension was large enough to have enough degrees of freedom to represent the underlying data (Wood 2017)<sup>5</sup>. The 'mgcv' library in R was chosen to model the penalized regression splines for its computational efficiency, automated selection of the smoothness parameter, and goodness of fit to the data (Wood 2003, 2011 & 2017).<sup>3-5</sup> The final model selection for measles and rubella by district is given below.

Table. Final model selection for age-specific seroprevalence curves, regression and link functions

| District                    | Measles      |               | Rubella      |               |
|-----------------------------|--------------|---------------|--------------|---------------|
|                             | Pre-campaign | Post-campaign | Pre-campaign | Post-campaign |
| Hoshiarpur, Punjab          | CR, cloglog  | CR, cloglog   | TP, logit    | CR, logit     |
| Dibrugarh, Assam            | TP, logit    | CR, logit     | CR, logit    | TP, cloglog   |
| Palghar, Maharashtra        | CR, logit    | CR, logit     | CL, cloglog  | TP, logit     |
| Kanpur Nagar, Uttar Pradesh | CR, logit    | TP, cloglog   | CR, logit    | CR, logit     |

Abbreviations: CR, cubic regression spline, TP, thin plate regression spline. All models used a smoothing parameter of 8 except Palghar District, Maharashtra, post-campaign rubella (smoothing parameter=6) and Hoshiarpur District, Punjab, post-campaign measles (smoothing parameter=7).

#### References

1. Census India. Rural and urban definition. : [http://censusindia.gov.in/2011-prov-results/paper2/data\\_files/india/Rural\\_Urban\\_2011.pdf](http://censusindia.gov.in/2011-prov-results/paper2/data_files/india/Rural_Urban_2011.pdf)
2. Census India. Urban slum. <https://pib.gov.in/newsite/PrintRelease.aspx?relid=68535>
3. Wood SN (2003). "Thin-plate regression splines." Journal of the Royal Statistical Society (B), 65(1), 95-114.

4. Wood SN (2011). "Fast stable restricted maximum likelihood and marginal likelihood estimation of semiparametric generalized linear models." *Journal of the Royal Statistical Society (B)*, 73(1), 3-36.  
 5. Wood S (2017). *Generalized Additive Models: An Introduction with R*, 2 edition. Chapman and Hall/CRC.

#### 4. Measles IgG Antibody Quantitative Adjustment

Initial measles IgG antibody results from the district-specific post-measles-rubella (MR) vaccination campaign serosurveys for the two districts tested in late 2019 and early 2020, indicated unexpectedly lower seroprevalence relative to the pre-campaign serosurveys (tested July through September 2018). These results were concerning and were discordant with estimated routine and campaign vaccination coverage in these districts. Although the measles IgG test kit remained the same (Euroimmun, EI 2610-9601 G), the kit lot differed between surveys, with approximately 8 different lots used prior to this time (E180312BR, E180332BR, E180508BS, E180905AG, E181204BF, E190204AG, E190321BI, E190409AD).

In reviewing the data on the four kit-provided calibrators, we observed an increase in the optical density (OD) value for the lowest calibrator (calibrator 4, set at 50 mIU/ml) starting with the lot midway (E190909RS) through the testing of the post-campaign specimens for the two districts (Figure 1). The calibrators are used to generate a point-to-point standard curve, where the slope and intercept of each line segment is used to convert the OD values to measles IgG antibody concentrations (mIU/ml) (Figure 2) from which to characterize a sample as seropositive, seronegative, or equivocal. Euroimmun confirmed a change to calibrator 4, starting with a lot midway through the testing of the post-campaign serosurveys, to achieve a more precise relationship to the WHO measles reference standard (personal communication). The reference OD value for this calibrator (as specified in the kit quality control inserts) increased from approximately 0.05 prior to the change to 0.15 after the change. Although the manufacturer reported this change had no qualitative impact using their validated threshold to define individual-level seropositivity ( $\geq 275$  mIU/ml), our analyses used the lower "immunity cut-off" described in the kit insert ( $\geq 200$  mIU/ml), which was based on the literature and recommended for assessing population-level seroprevalence. Their internal quality control investigations, which they referenced when reporting no qualitative impact of the change in calibrator, was limited to quality control specimens with a reference range  $< 75$  IU/L and  $> 389$  IU/L, excluding samples around the negative-equivocal threshold (200-275 mIU/ml per their validation). We observed this change to the calibrator qualitatively impacts results when using the lower threshold, making it difficult to compare seroprevalence results from the pre- and post-SIA serosurveys for the two districts where the calibrator changed between surveys.

**4.A. Figure: Calibrator 4 (50 mIU/ml) optical density measurements across plates and kit lots.** Each point represents a different plate (plate numbers restarted for each site tested so there may be multiple 'Plate 1s' in a figure). All plates were run at the National Institute of Virology (2018-2020). Lot E190909RS was the first lot where we observed the issue with the post-campaign samples testing lower than the pre-campaign. Additional lots were purchased to check for lot-specific issues, however similarly low findings were seen for additional lots. Higher calibrator 4 OD value were seen in all lots after E190909RS.

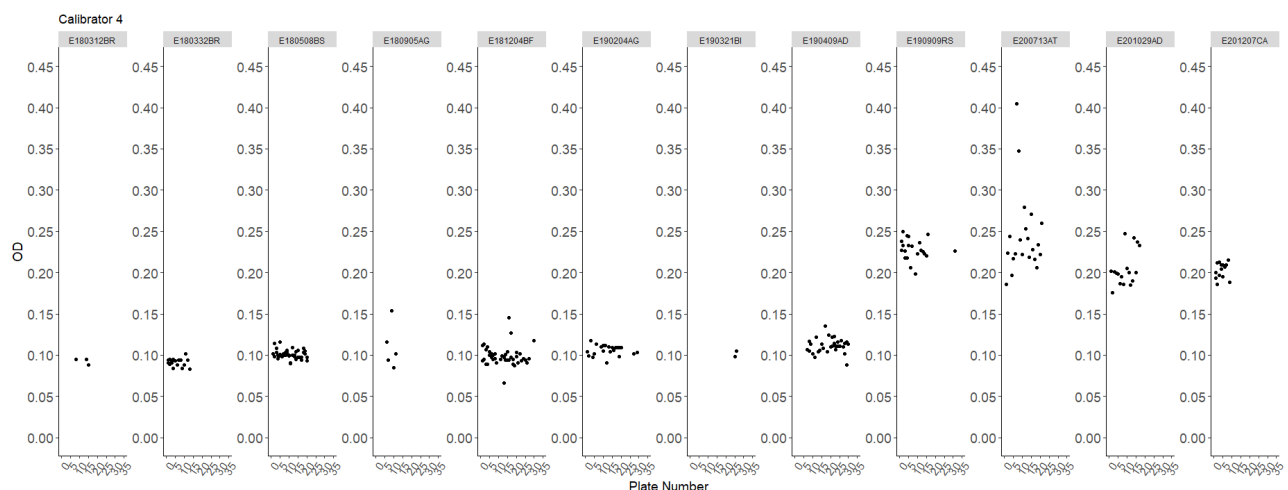

**4.B. Figure. Example point-to-point standard curve used to convert OD values to concentration (mIU/ml).** Calibrators from left to right points: calibrator 4 (50 mIU/ml); calibrator 3 (250 mIU/ml); calibrator 2 (1000 mIU/ml); calibrator 1 (5000 mIU/ml)

**4.B.1. Calibrator 4 Optical Density 0.1 (observed with earlier lots)**

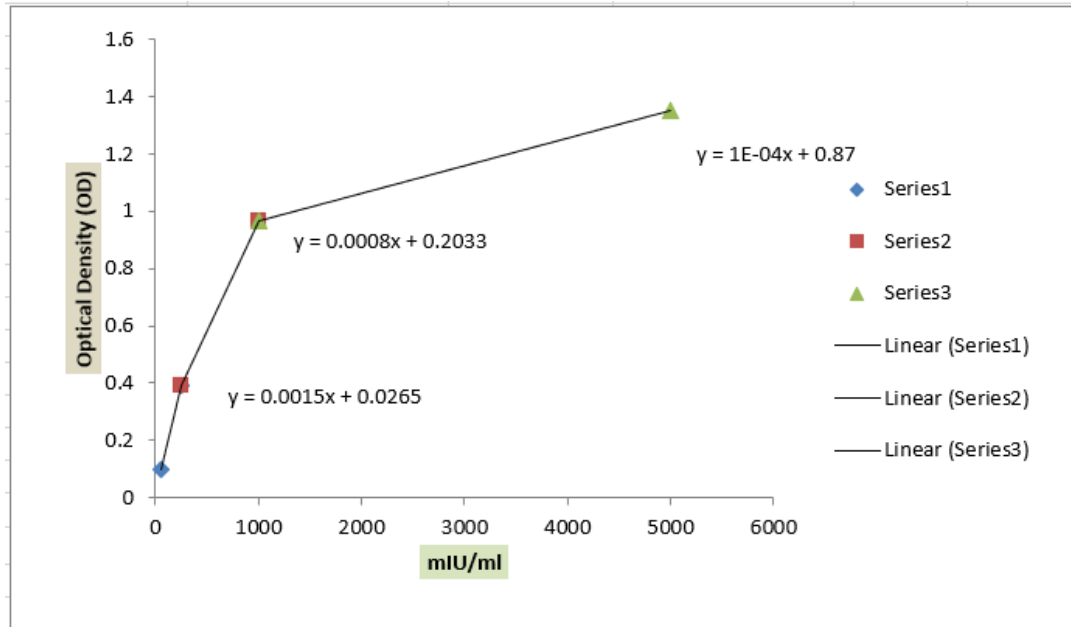

**4.B.2: Calibrator 4 Optical Density 0.2 (observed with current lots; resulting in decreased slope and increased intercept for OD values falling within this line segment)**

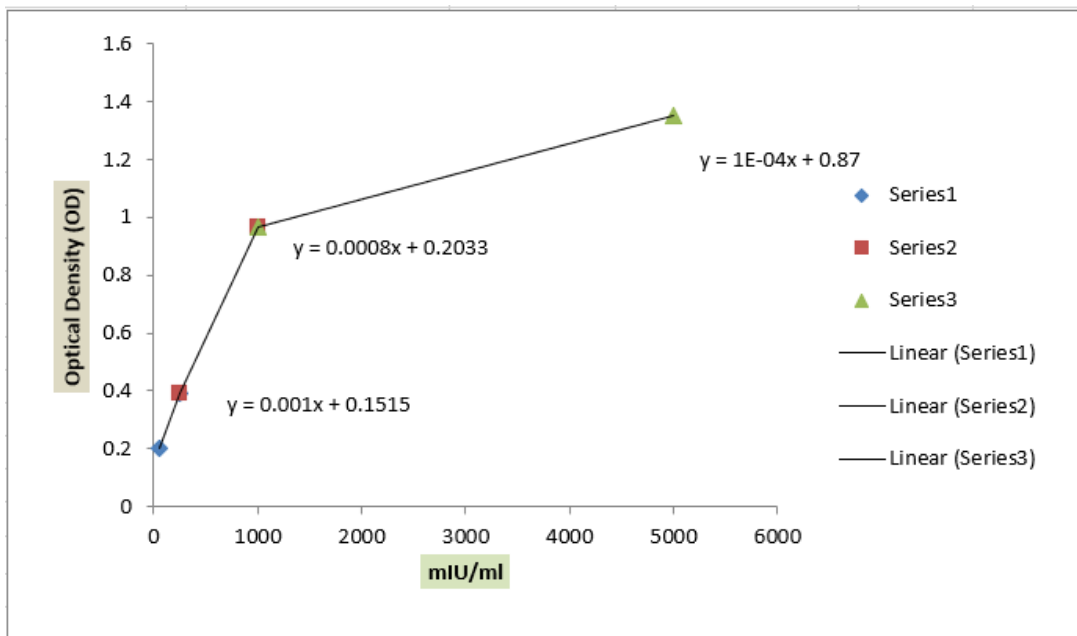

Two hundred specimens from post-campaign serosurveys tested on lots prior to the calibrator change were re-tested on a current lot (E201207CA), oversampling specimens near the thresholds (100 – 250 mIU/ml). These specimens were originally tested on three different lots (all prior to the calibrator change). Ten percent of the positive specimens and 48% of the equivocal specimens tested negative on the current lot (4.C.Table). Lower quantitative results were observed with the current lot (4.D.Figure) regardless of the lot used in the original testing. This evidence suggests the lots used to test the earlier post-campaign serosurveys behaved differently than the current lots and the change is likely attributed to the calibrator 4 change occurring in late 2019.



**4.C. Table: Lot-to-lot qualitative comparison of post-campaign specimens from the Palghar District, Maharashtra and Kanpur Nagar District Uttar, Pradesh serosurveys.** Red indicates qualitative change in the interpretation of results with the repeat lot (treating equivocal as positive).

| Repeat measles qualitative results (E201207CA) | Original measles qualitative results (All lots) |           |          |       |
|------------------------------------------------|-------------------------------------------------|-----------|----------|-------|
|                                                | Positive                                        | Equivocal | Negative | Total |
| Positive                                       | 42                                              | 5         | 0        | 47    |
| Equivocal                                      | 19                                              | 31        | 3        | 53    |
| Negative                                       | 7                                               | 33        | 60       | 100   |
| <b>Total</b>                                   | 68                                              | 69        | 63       | 200   |

**4.D. Figure. Lot-to-lot quantitative comparison of post-campaign specimens from the Palghar District, Maharashtra and Kanpur Nagar District Uttar, Pradesh serosurveys**

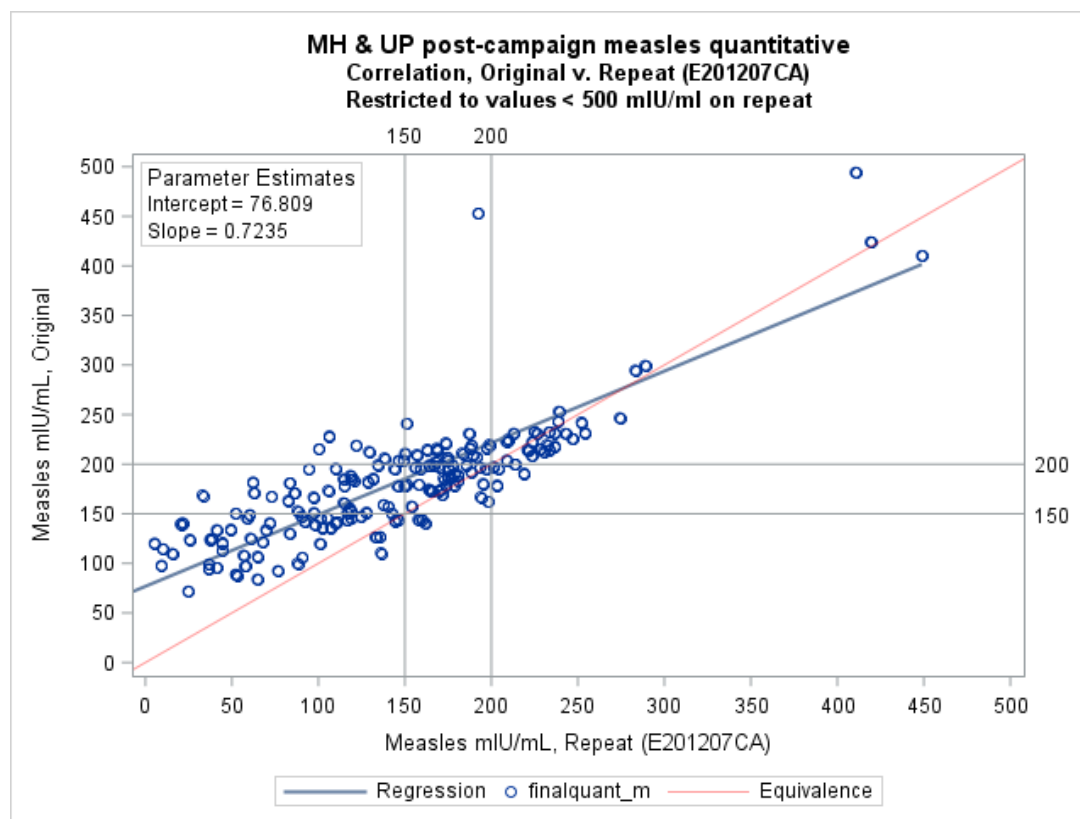

Since the change in calibrator 4 occurred between the pre-campaign and post-campaign serosurveys for two of the serosurveys (Hoshiarpur District, Punjab and Dibrugarh District, Assam), it is difficult to compare results and assess the impact of the campaign in these districts. To allow for comparability we tested four hundred and three specimens from the Punjab and Assam pre-campaign serosurveys, originally tested in 2018, using the current lot (E201207CA). The pre-campaign specimens were stratified based on measles quantitative values (low negative < 100 mIU/ml; high negative 100-199 mIU/ml; low positive 200-399 mIU/ml; and high positive > 400 mIU/ml) then specimens were randomly selected so that the bulk of samples selected were near the thresholds, with just a few high positives. Twenty percent of the positive specimens and 96% of the equivocal specimens tested negative on the current lot (4.E.Table). We were unable to do a similar exercise by testing post-campaign samples on an older lot as kits were available or expired.

**4.E. Table: Lot-to-lot qualitative comparison of pre-campaign specimens from the Hoshiarpur District, Punjab and Dibrugarh District, Assam serosurveys.** Red indicates qualitative change in the interpretation of results with the repeat lot (treating equivocal as positive).

| Repeat measles qualitative results (E201207CA) | Original measles qualitative results |           |          | Total |
|------------------------------------------------|--------------------------------------|-----------|----------|-------|
|                                                | Positive                             | Equivocal | Negative |       |
| Positive                                       | 127                                  | 0         | 0        | 127   |
| Equivocal                                      | 21                                   | 4         | 0        | 25    |
| Negative                                       | 37                                   | 94        | 120      | 251   |
| <b>Total</b>                                   | 185                                  | 98        | 120      | 403   |

We used the lot-to-lot linear relationship for the Punjab and Assam pre-campaign specimens to develop a correction factor to apply to the Punjab and Assam post-campaign specimens (4.F. Figure). We chose to correct the post-SIA results using the earlier calibrator, rather than correct the pre-SIA using the updated calibrator, because we believe the post-campaign survey results run on the lots after the change in calibrator to be more problematic given the sensitivity issues we observed when comparing results for specimens run on prior lots. We saw a substantial increase in rubella seroprevalence after the SIA in these two districts, and in the absence of a rubella outbreak this change we attributed this change primarily to the SIA. While we cannot state which result is “correct”, it was unrealistic to have a lower measles seroprevalence in the post-SIA survey relative to the pre-SIA survey in these districts, as we had observed prior to the correction, given the routine and SIA coverage and the rubella findings. Therefore, we decided to adjust the post-SIA specimens using the earlier calibrator.

We used 250 mIU/ml as the upper bound for developing the correction factor. This reflects the value of calibrator 3, which, along with the recently changed calibrator 4 (50 mIU/ml), form the line segment used to calculate concentrations for the lowest specimens (see example standard curve). Since the lot-to-lot relationship was similar between the two pre-campaign serosurveys and, given that we attributed this to a change in the calibrator rather than a lot-specific issue, we combined data from both pre-campaign serosurveys to determine the correction factor. The slope (1.3298) and intercept (85.7) from the lot-to-lot comparison was then applied to the Punjab and Assam post-campaign specimens that tested < 250 mIU/ml on the current lot.

**4.F. Figure. Lot-to-lot quantitative comparison of post-campaign specimens from the Hoshiarpur District, Punjab and Dibrugarh District, Assam serosurveys**

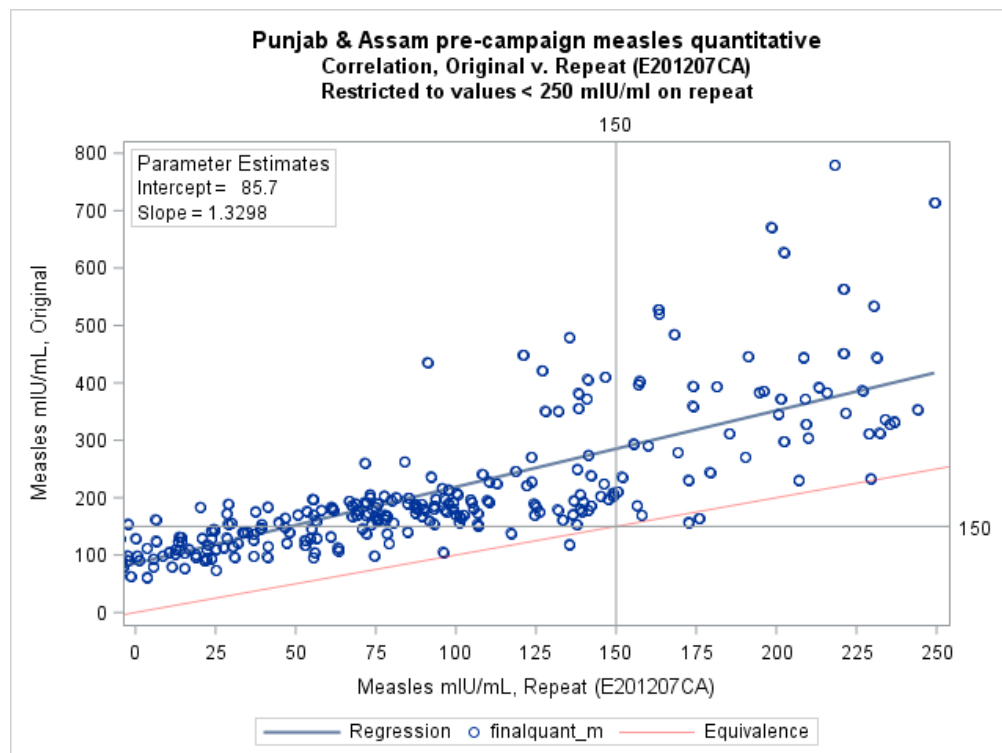

Based on the findings from the lot-to-lot comparison using specimens from other post-campaign serosurveys and the timing of the change to calibrator 4 we did not apply this adjustment to specimens from any other surveys.

Lot-to-lot testing of a sample of post-SIA specimens from the other two serosurveys also suggested the current kit behaved differently than the earlier kits and the observations were likely attributed to the change in the calibrator.

5. Figure 2-A: Flowchart describing the enrolment of participants in the pre and post-SIA serosurveys by district

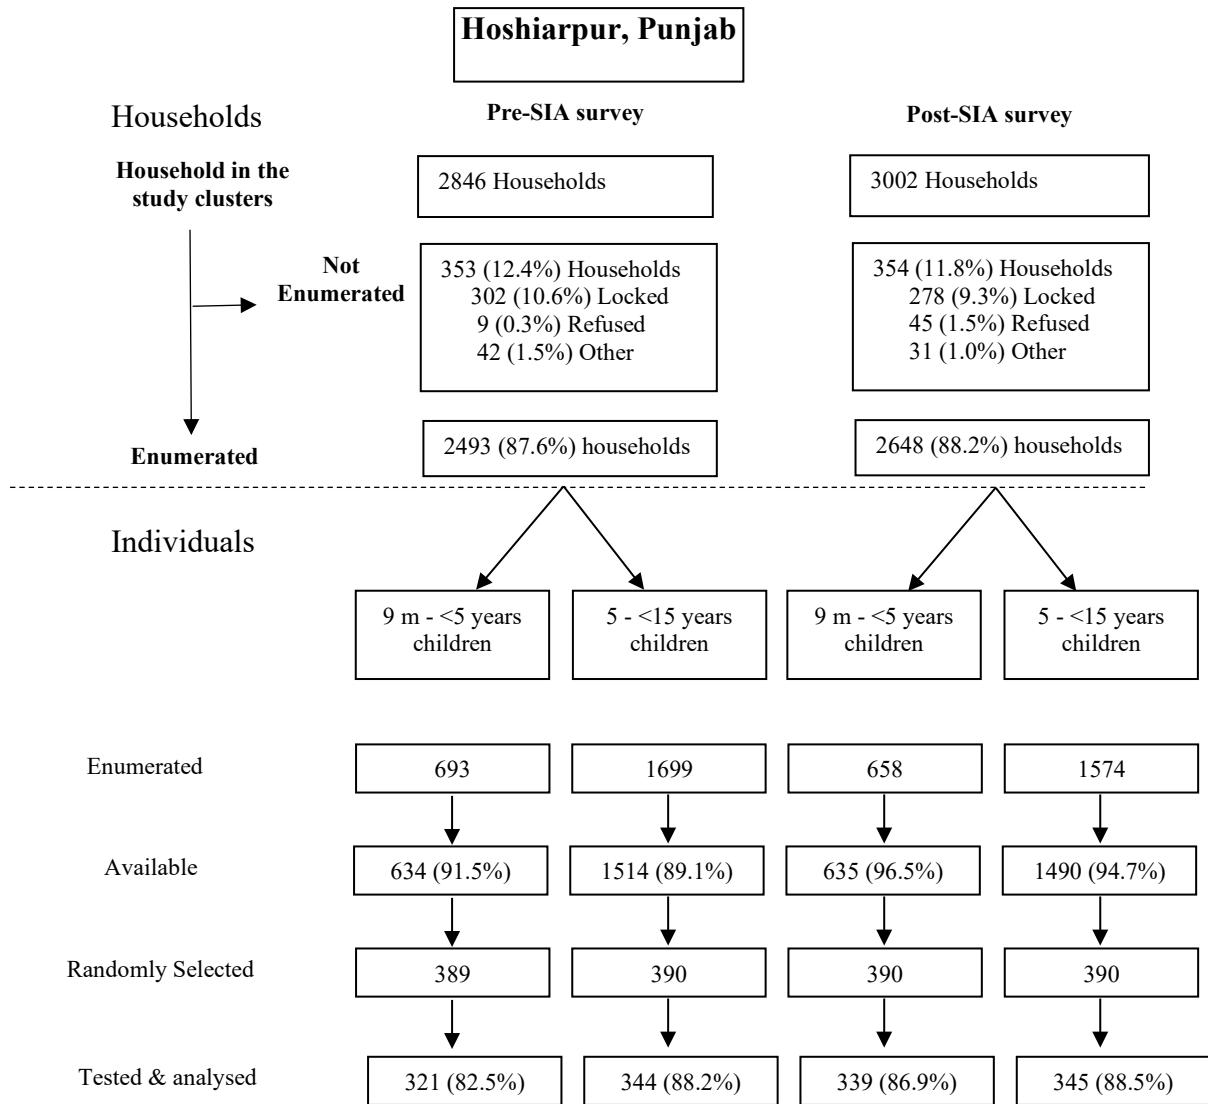

**Enumerated:** Visited all households in the cluster and collect identification details (name, date of birth/age, gender)  
**Available:** Children are available for the next three days **Randomly selected:** Automated selection of children from enumeration data using android application. **Enrolled:** Data collected after obtaining consent/assent **Tested and analysed:** Children with adequate sample volume tested and analysed in the final dataset

**Figure 2-B: Flowchart describing the enrolment of participants in the pre and post-SIA serosurveys by district**

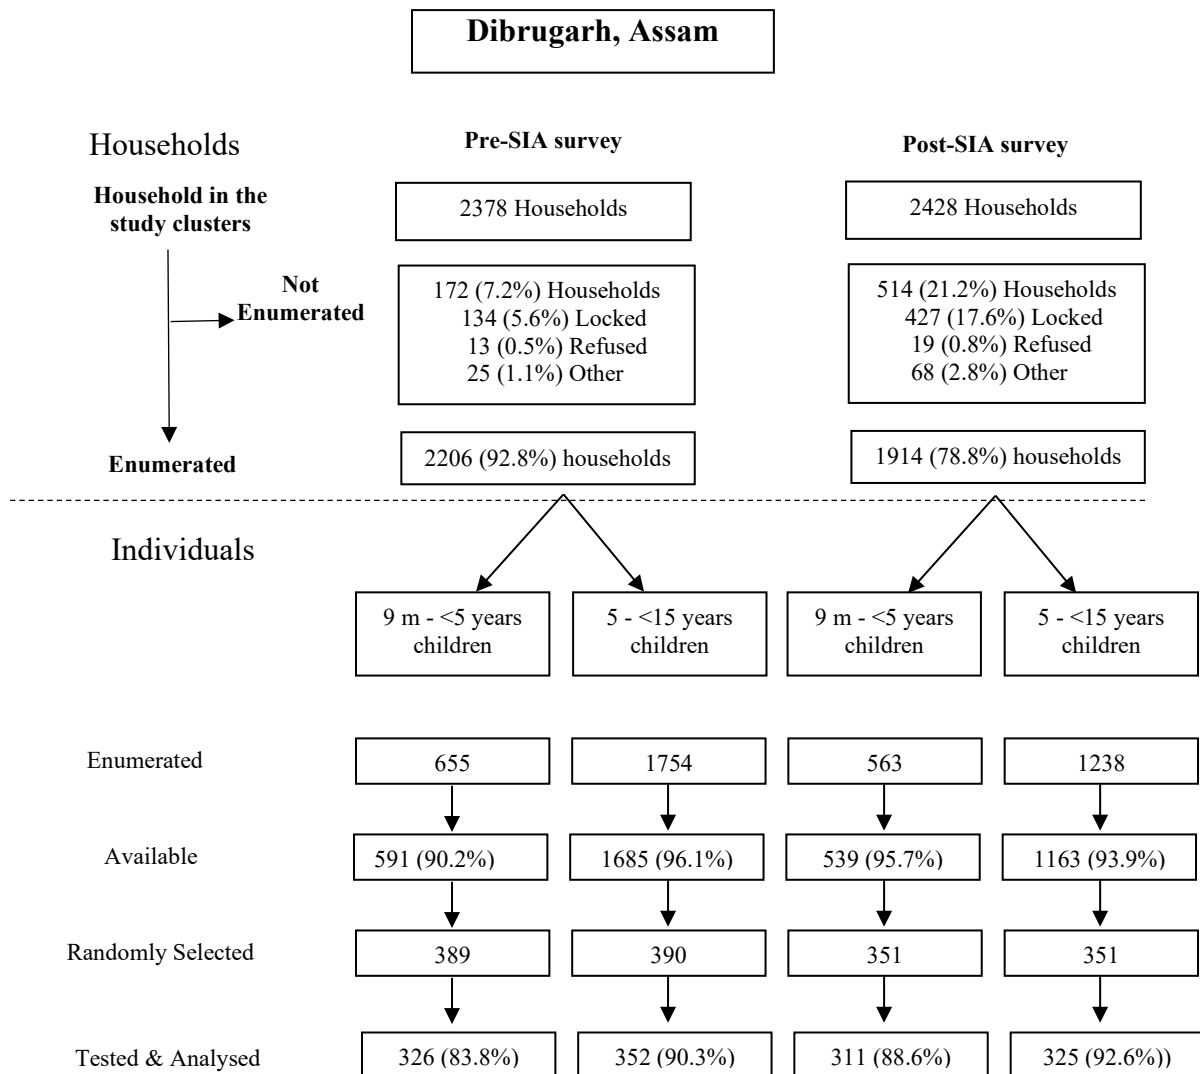

**Enumerated:** Visited all households in the cluster and collect identification details (name, date of birth/age, gender)

**Available:** Children are available for the next three days

**Randomly selected:** Automated selection of children from enumeration data using android application.

**Enrolled:** Data collected after obtaining consent/assent

**Tested and analysed:** Children with adequate sample volume tested and analysed in the final dataset

**Figure 2-C: Flowchart describing the enrolment of participants in the pre and post-SIA serosurveys by district**

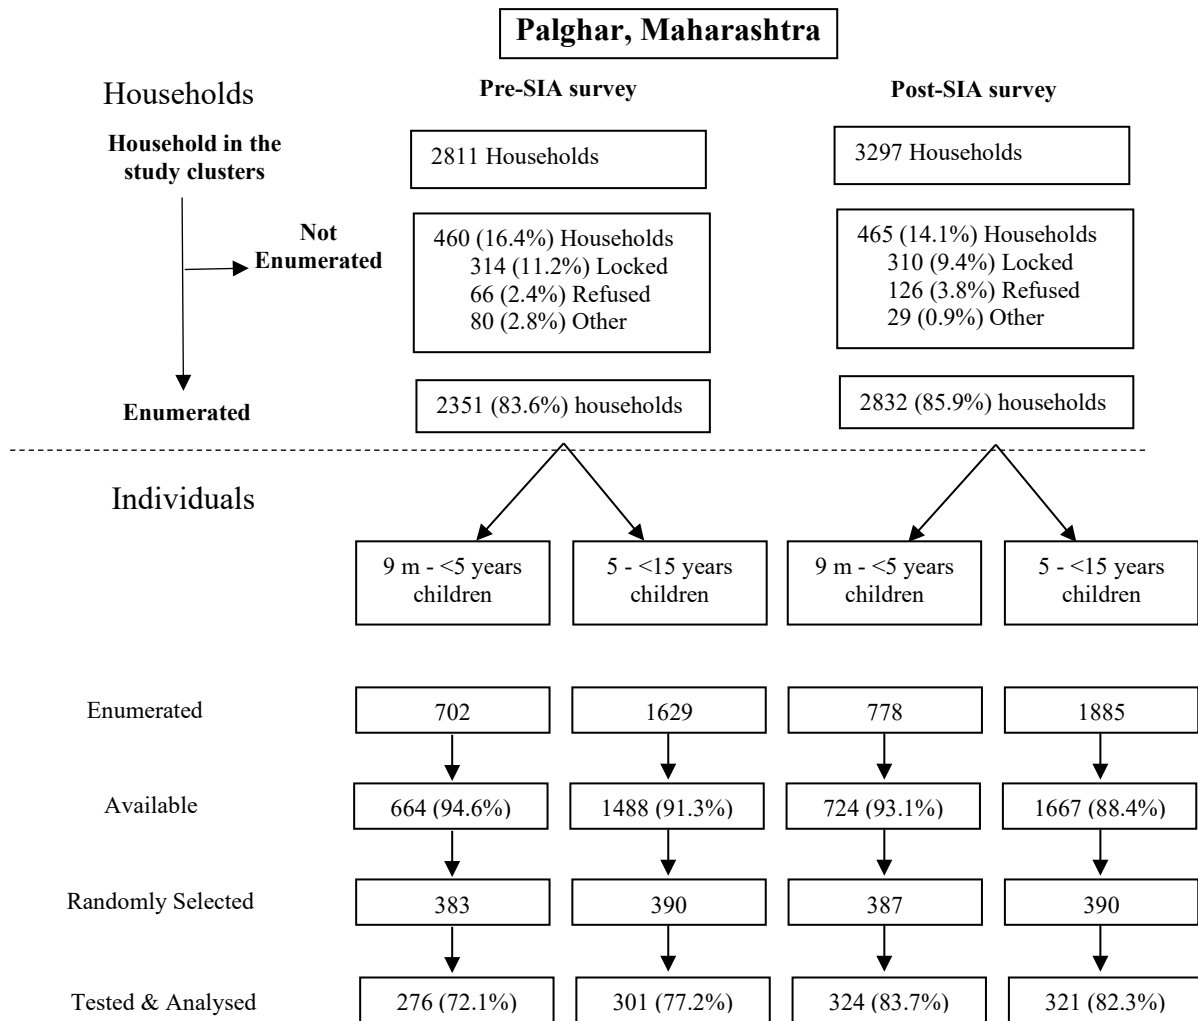

**Enumerated:** Visited all households in the cluster and collect identification details (name, date of birth/age, gender)

**Available:** Children are available for the next three days

**Randomly selected:** Automated selection of children from enumeration data using android application.

**Enrolled:** Data collected after obtaining consent/assent

**Tested and analysed:** Children with adequate sample volume tested and analysed in the final dataset

**Figure 2-D: Flowchart describing the enrolment of participants in the pre and post-SIA serosurveys by district**

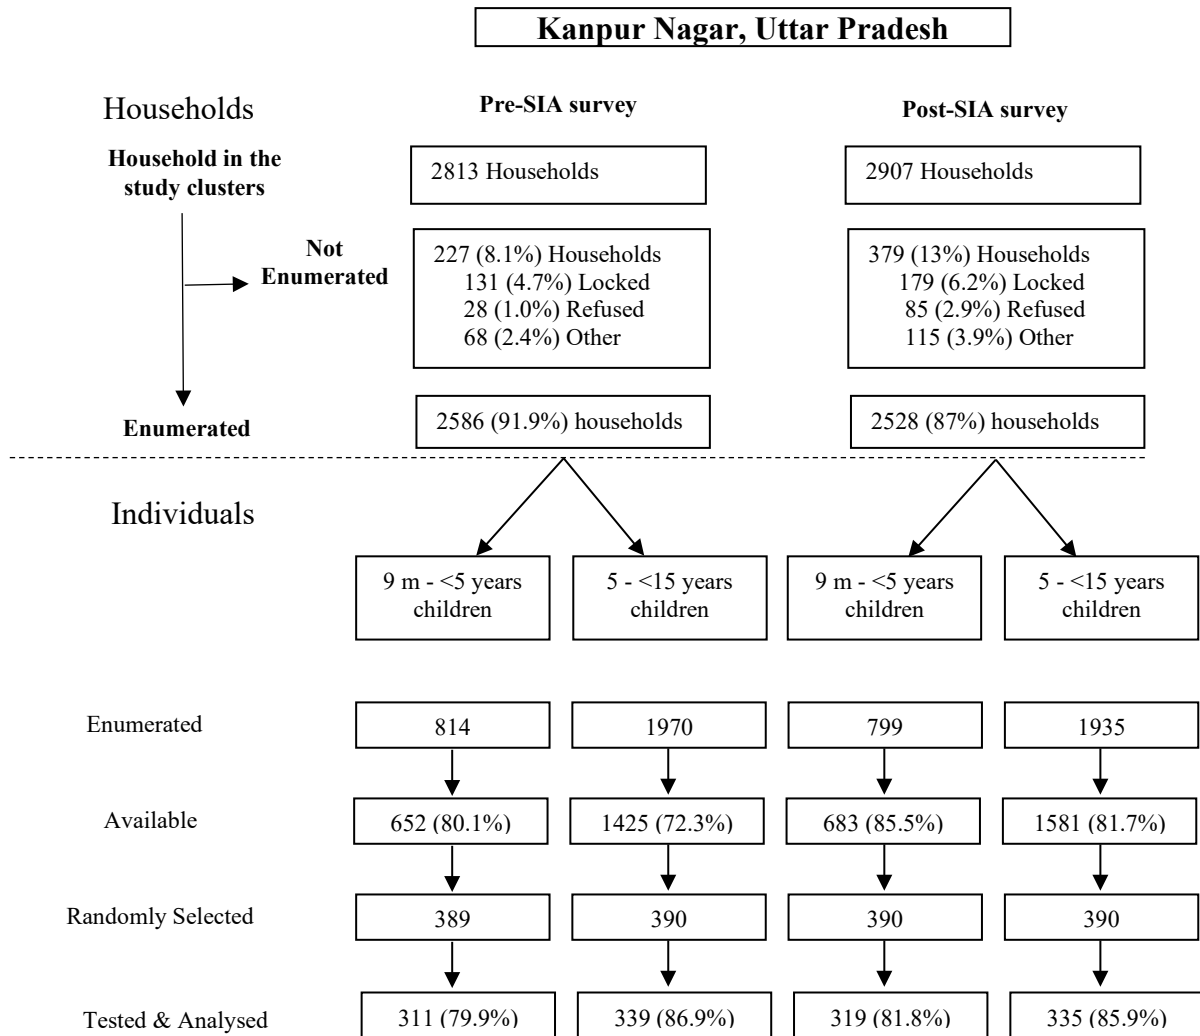

**Enumerated:** Visited all households in the cluster and collect identification details (name, date of birth/age, gender)

**Available:** Children are available for the next three days **Randomly selected:** Automated selection of children from enumeration data using android application.

**Enrolled:** Data collected after obtaining consent/assent **Tested and analysed:** Children with adequate sample volume tested and analysed in the final dataset

6. Table 2: Characteristics of participants among children aged 9 months -<5 years by district

| Characteristics                   | Hoshiarpur, Punjab |                     |          | Dibrugarh, Assam   |                     |          | Palghar, Maharashtra |                     |          | Kanpur Nagar, Uttar Pradesh |                     |          |
|-----------------------------------|--------------------|---------------------|----------|--------------------|---------------------|----------|----------------------|---------------------|----------|-----------------------------|---------------------|----------|
|                                   | Pre-SIA<br>(n=321) | Post-SIA<br>(n=339) | P value# | Pre-SIA<br>(n=326) | Post-SIA<br>(n=311) | P Value# | Pre-SIA<br>(n=276)   | Post-SIA<br>(n=324) | P value# | Pre-SIA<br>(n=311)          | Post-SIA<br>(n=319) | P value# |
| <b>Female sex</b>                 | 170 (53.0)         | 166 (49.0)          | 0.3      | 174 (53.4)         | 147 (47.3)          | 0.12     | 132 (47.8)           | 171 (52.8)          | 0.23     | 160 (51.4)                  | 150 (47.0)          | 0.27     |
| <b>Religion</b>                   | n = 307            | n = 335             | 0.07     | n = 324            | n = 311             | 0.01     | n = 273              | n = 324             | 0.07     | n = 311                     | n = 319             | 0.07     |
| Hindu                             | 220 (71.7)         | 231 (69.0)          |          | 301 (92.9)         | 294 (94.5)          |          | 255 (93.4)           | 297 (91.7)          |          | 272 (87.5)                  | 293 (91.8)          |          |
| Muslim / Christian                | 12 (3.9)           | 5 (1.5)             |          | 14 (4.3)           | 17 (5.5)            |          | 17 (6.2)             | 18 (5.6)            |          | 39 (12.5)                   | 26 (8.2)            |          |
| Sikhs / Buddhist / Jain           | 75 (24.4)          | 99 (29.6)           |          | 9 (2.8)            | 0 (0.0)             |          | 1 (0.4)              | 9 (2.8)             |          | 0 (0.0)                     | 0 (0.0)             |          |
| <b>Caste</b>                      | n = 305            | n = 335             | 0.09     | n = 321            | n = 301             | 0.35     | n = 267              | n = 321             | 0.07     | n = 310                     | n = 319             | 0.87     |
| General/ Other Backward Class     | 187 (61.3)         | 238 (71.0)          |          | 264 (82.2)         | 256 (85.0)          |          | 119 (44.6)           | 179 (55.8)          |          | 211 (68.1)                  | 219 (68.7)          |          |
| Scheduled Caste / Scheduled Tribe | 118 (38.7)         | 97 (29.0)           |          | 57 (17.8)          | 45 (15.0)           |          | 148 (55.4)           | 142 (44.2)          |          | 99 (31.9)                   | 100 (31.3)          |          |
| <b>Mother's Occupation</b>        | n = 321            | n = 337             | <0.001   | n = 325            | n = 307             | <0.001   | n = 275              | n = 323             | <0.001   | n = 309                     | n = 318             | 0.08     |
| Employed                          | 20 (6.2)           | 48 (14.2)           |          | 115 (35.4)         | 58 (19.0)           |          | 14 (5.1)             | 141 (43.6)          |          | 13 (4.2)                    | 24 (7.6)            |          |
| Home maker                        | 301 (93.8)         | 289 (85.8)          |          | 210 (64.6)         | 249 (81.1)          |          | 261 (94.9)           | 182 (56.3)          |          | 296 (95.8)                  | 294 (92.4)          |          |
| <b>Mother's education</b>         | n = 321            | n = 338             | 0.004    | n = 323            | n = 307             | <0.001   | n = 275              | n = 324             | <0.001   | n = 309                     | n = 318             | 0.14     |
| Graduate and above                | 48 (15.0)          | 72 (21.3)           |          | 17 (5.3)           | 23 (7.5)            |          | 21 (7.6)             | 48 (14.8)           |          | 62 (20.1)                   | 77 (24.2)           |          |
| 11-12 years (higher secondary)    | 70 (21.8)          | 90 (26.6)           |          | 27 (8.4)           | 26 (8.5)            |          | 12 (4.4)             | 33 (10.2)           |          | 19 (6.1)                    | 32 (10.1)           |          |
| 6-10 years (middle/high school)   | 128 (39.9)         | 131 (38.8)          |          | 170 (52.6)         | 122 (39.7)          |          | 126 (45.8)           | 136 (42.0)          |          | 114 (36.9)                  | 114 (35.8)          |          |
| ≤ 5 years (primary school)        | 43 (13.4)          | 22 (6.5)            |          | 31 (9.6)           | 112 (36.5)          |          | 52 (18.9)            | 35 (10.8)           |          | 46 (14.9)                   | 42 (13.2)           |          |
| Illiterate                        | 32 (10.0)          | 23 (6.8)            |          | 78 (24.1)          | 24 (7.8)            |          | 64 (23.3)            | 72 (22.2)           |          | 68 (22.0)                   | 53 (16.7)           |          |
| <b>Type of house*</b>             | n = 309            | n = 335             | 0.001    | n = 324            | n = 311             | <0.001   | n = 273              | n = 324             | 0.1      | n = 311                     | n = 319             | 0.006    |
| Kutcha                            | 11 (3.6)           | 16 (4.8)            |          | 177 (54.6)         | 224 (72.0)          |          | 45 (16.5)            | 64 (19.8)           |          | 19 (6.1)                    | 39 (12.2)           |          |
| Pucca                             | 250 (80.9)         | 298 (89.0)          |          | 88 (27.2)          | 47 (15.1)           |          | 106 (38.8)           | 143 (44.1)          |          | 162 (52.1)                  | 176 (55.2)          |          |
| Semi-pucca                        | 48 (15.5)          | 21 (6.3)            |          | 59 (18.2)          | 40 (12.9)           |          | 122 (44.7)           | 117 (36.1)          |          | 130 (41.8)                  | 104 (32.6)          |          |



Continued.....Table 2: Characteristics of participants among children aged 9 months -<5 years by district

| Characteristics                                 | Hoshiarpur, Punjab            |                                |          | Dibrugarh, Assam              |                                |          | Palghar, Maharashtra          |                                |          | Kanpur Nagar, Uttar Pradesh   |                                |          |
|-------------------------------------------------|-------------------------------|--------------------------------|----------|-------------------------------|--------------------------------|----------|-------------------------------|--------------------------------|----------|-------------------------------|--------------------------------|----------|
|                                                 | Pre-SIA<br>(n=321)<br>n = 321 | Post-SIA<br>(n=339)<br>n = 339 | P value# | Pre-SIA<br>(n=326)<br>n = 326 | Post-SIA<br>(n=311)<br>n = 311 | P value# | Pre-SIA<br>(n=276)<br>n = 276 | Post-SIA<br>(n=324)<br>n = 324 | P value# | Pre-SIA<br>(n=311)<br>n = 311 | Post-SIA<br>(n=319)<br>n = 319 | P value# |
| <b>Type of Residence</b>                        |                               |                                | <0.001   |                               |                                | 0.004    |                               |                                | <0.001   |                               |                                | <0.001   |
| Rural                                           | 263 (81.9)                    | 225 (66.4)                     |          | 264 (81.0)                    | 244 (78.5)                     |          | 162<br>(58.7)                 | 158<br>(48.8)                  |          | 94 (30.2)                     | 114 (35.7)                     |          |
| Urban Slum                                      | 10 (3.1)                      | 11 (3.2)                       |          | 45 (13.8)                     | 30 (9.6)                       |          | 30 (10.9)                     | 80 (24.7)                      |          | 83 (26.7)                     | 116 (36.4)                     |          |
| Urban Non-Slum                                  | 48 (15.0)                     | 103 (30.4)                     |          | 17 (5.2)                      | 37 (11.9)                      |          | 84 (30.4)                     | 86 (26.5)                      |          | 134 (43.1)                    | 89 (27.9)                      |          |
| <b>Toilet</b>                                   | n = 309                       | n = 335                        | <0.001   | n = 324                       | n = 311                        | 0.003    | n = 273                       | n = 324                        | 0.27     | n = 311                       | n = 319                        | <0.001   |
| Own toilet                                      | 250 (80.9)                    | 316 (94.3)                     |          | 286 (88.3)                    | 297 (95.5)                     |          | 203<br>(74.4)                 | 259<br>(79.9)                  |          | 205 (65.9)                    | 222 (69.6)                     |          |
| Common toilet/Public toilet                     | 12 (3.9)                      | 2 (0.6)                        |          | 37 (11.4)                     | 14 (4.5)                       |          | 30 (11.0)                     | 27 (8.3)                       |          | 23 (7.4)                      | 61 (19.1)                      |          |
| No facilities/uses open space                   | 47 (15.2)                     | 17 (5.1)                       |          | 1 (0.3)                       | 0 (0.0)                        |          | 40 (14.7)                     | 38 (11.7)                      |          | 83 (26.7)                     | 36 (11.3)                      |          |
| <b>Health seeking behaviour for vaccination</b> | n = 309                       | n = 334                        | 0.44     | n = 324                       | n = 311                        | 0.93     | n = 273                       | n = 324                        | 0.23     | n = 309                       | n = 312                        | <0.001   |
| Public                                          | 298 (96.4)                    | 318 (95.2)                     |          | 314 (96.9)                    | 301 (96.8)                     |          | 255<br>(93.4)                 | 294<br>(90.7)                  |          | 212 (68.6)                    | 280 (89.7)                     |          |
| Private / Others                                | 11 (3.6)                      | 16 (4.8)                       |          | 10 (3.1)                      | 10 (3.2)                       |          | 18 (6.6)                      | 30 (9.3)                       |          | 97 (31.4)                     | 32 (10.3)                      |          |

**SIA:** Supplementary Immunization Activities #Chi-square test \* **Kutch house:** Houses made from mud, thatch, or other low-quality materials. **Semi-pucca house:** Houses made from high quality walls with thatched roofs **Pucca house:** Houses made with high quality materials throughout, including the floor, roof, and exterior walls

7. Table 3: Characteristics of participants among children aged 5-<15 years by district

| Characteristics                   | Hoshiarpur, Punjab |                     |          | Dibrugarh, Assam   |                     |          | Palghar, Maharashtra |                     |          | Kanpur Nagar, Uttar Pradesh |                     |          |
|-----------------------------------|--------------------|---------------------|----------|--------------------|---------------------|----------|----------------------|---------------------|----------|-----------------------------|---------------------|----------|
|                                   | Pre-SIA<br>(n=344) | Post-SIA<br>(n=345) | P value# | Pre-SIA<br>(n=352) | Post-SIA<br>(n=325) | P value# | Pre-SIA<br>(n=301)   | Post-SIA<br>(n=321) | P value# | Pre-SIA<br>(n=339)          | Post-SIA<br>(n=335) | P value# |
| <b>Female sex</b>                 | 163 (47.4)         | 168 (48.7)          | 0.73     | 174 (49.4)         | 164 (50.5)          | 0.79     | 135 (44.9)           | 163 (50.8)          | 0.14     | 166 (49.0)                  | 146 (43.6)          | 0.16     |
| <b>Religion</b>                   | n = 334            | n = 342             | 0.34     | n = 351            | n = 322             | 0.05     | n = 301              | n = 321             | 0.28     | n = 338                     | n = 335             | 0.25     |
| Hindu                             | 228 (68.3)         | 229 (67.0)          |          | 329 (93.7)         | 302 (93.8)          |          | 278 (92.4)           | 285 (88.8)          |          | 298 (88.2)                  | 303 (90.4)          |          |
| Muslim / Christian                | 12 (3.6)           | 6 (1.8)             |          | 14 (4.0)           | 19 (5.9)            |          | 18 (6.0)             | 26 (8.1)            |          | 40 (11.8)                   | 32 (9.6)            |          |
| Sikhs / Buddhist / Jain           | 94 (28.1)          | 107 (31.3)          |          | 8 (2.3)            | 1 (0.3)             |          | 5 (1.7)              | 10 (3.1)            |          | 0 (0.0)                     | 0 (0.0)             |          |
| <b>Caste</b>                      | n = 329            | n = 342             | 0.09     | n = 350            | n = 316             | 0.64     | n = 295              | n = 315             | 0.004    | n = 338                     | n = 335             | 0.19     |
| General/Other backward class      | 194 (59.0)         | 235 (68.7)          |          | 297 (84.9)         | 264 (83.5)          |          | 135 (45.8)           | 181 (57.5)          |          | 220 (65.1)                  | 234 (69.9)          |          |
| Scheduled Caste / Scheduled Tribe | 135 (41.0)         | 107 (31.3)          |          | 53 (15.1)          | 52 (16.5)           |          | 160 (54.2)           | 134 (42.5)          |          | 118 (34.9)                  | 101 (30.1)          |          |
| <b>Mother's Occupation</b>        | n = 338            | n = 340             | 0.98     | n = 339            | n = 314             | <0.001   | n = 297              | n = 313             | <0.001   | n = 334                     | n = 330             | 0.001    |
| Employed                          | 34 (10.1)          | 34 (10.0)           |          | 154 (45.4)         | 82 (26.1)           |          | 33 (11.1)            | 123 (39.3)          |          | 21 (6.3)                    | 46 (13.9)           |          |
| Home maker                        | 304 (89.9)         | 306 (90.0)          |          | 185 (54.6)         | 232 (73.9)          |          | 264 (89.0)           | 190 (60.7)          |          | 313 (93.7)                  | 284 (86.1)          |          |
| <b>Mother's education</b>         | n = 339            | n = 339             | 0.31     | n = 338            | n = 314             | <0.001   | n = 297              | n = 314             | 0.002    | n = 334                     | n = 330             | 0.17     |
| Graduate and above                | 34 (10.0)          | 40 (11.8)           |          | 17 (5.0)           | 18 (5.7)            |          | 34 (11.4)            | 29 (9.2)            |          | 47 (14.1)                   | 44 (13.3)           |          |
| 11-12 years (higher secondary)    | 72 (21.2)          | 79 (23.3)           |          | 20 (5.9)           | 18 (5.7)            |          | 2 (0.7)              | 17 (5.4)            |          | 17 (5.1)                    | 32 (9.7)            |          |
| 6-10 years (middle/high school)   | 148 (43.7)         | 158 (46.6)          |          | 162 (47.9)         | 129 (41.1)          |          | 112 (37.7)           | 133 (42.4)          |          | 104 (31.1)                  | 100 (30.3)          |          |
| ≤ 5 years (primary school)        | 52 (15.3)          | 37 (10.9)           |          | 40 (11.8)          | 123 (39.2)          |          | 59 (19.9)            | 40 (12.7)           |          | 61 (18.3)                   | 66 (20.0)           |          |
| Illiterate                        | 33 (9.7)           | 25 (7.4)            |          | 99 (29.3)          | 26 (8.3)            |          | 90 (30.3)            | 95 (30.3)           |          | 105 (31.4)                  | 88 (26.7)           |          |
| <b>Type of house*</b>             | n = 334            | n = 342             | <0.001   | n = 351            | n = 322             | <0.001   | n = 301              | n = 321             | 0.36     | n = 338                     | n = 335             | 0.11     |
| Kutcha                            | 15 (4.5)           | 10 (2.9)            |          | 192 (54.7)         | 218 (67.7)          |          | 54 (17.9)            | 48 (15.0)           |          | 20 (5.9)                    | 26 (7.8)            |          |
| Semi-pucca                        | 57 (17.1)          | 19 (5.6)            |          | 51 (14.5)          | 53 (16.5)           |          | 126 (41.9)           | 127 (39.6)          |          | 148 (43.8)                  | 121 (36.1)          |          |
| Pucca                             | 262 (78.4)         | 313 (91.5)          |          | 108 (30.8)         | 51 (15.8)           |          | 121 (40.2)           | 146 (45.5)          |          | 170 (50.3)                  | 188 (56.1)          |          |

Continued.....Table 3: Characteristics of participants among children aged 5-<15 years by district

| Characteristics                                 | Hoshiarpur, Punjab |                     |          | Dibrugarh, Assam   |                     |          | Palghar, Maharashtra |                     |          | Kanpur Nagar, Uttar Pradesh |                     |          |
|-------------------------------------------------|--------------------|---------------------|----------|--------------------|---------------------|----------|----------------------|---------------------|----------|-----------------------------|---------------------|----------|
|                                                 | Pre-SIA<br>(n=344) | Post-SIA<br>(n=345) | P value# | Pre-SIA<br>(n=352) | Post-SIA<br>(n=325) | P value# | Pre-SIA<br>(n=301)   | Post-SIA<br>(n=321) | P value# | Pre-SIA<br>(n=339)          | Post-SIA<br>(n=335) | P value# |
| <b>Type of Residence</b>                        | n = 344            | n = 345             | <0.001   | n = 352            | n = 325             | 0.005    | n = 301              | n = 321             | <0.001   | n = 339                     | n = 335             | 0.001    |
| Rural                                           | 276 (80.2)         | 229<br>(66.4)       |          | 277<br>(78.7)      | 251<br>(77.2)       |          | 168 (55.8)           | 156 (48.6)          |          | 98 (28.9)                   | 125 (37.3)          |          |
| Urban Slum                                      | 13 (3.8)           | 12 (3.5)            |          | 55 (15.6)          | 35 (10.8)           |          | 37 (12.3)            | 81 (25.2)           |          | 97 (28.6)                   | 113 (33.7)          |          |
| Urban Non-Slum                                  | 55 (16.0)          | 104<br>(30.1)       |          | 20 (5.7)           | 39 (12.0)           |          | 96 (31.9)            | 84 (26.2)           |          | 144 (42.5)                  | 97 (29.0)           |          |
| <b>Toilet</b>                                   | n = 344            | n = 342             | <0.001   | n = 351            | n = 322             | <0.001   | n = 301              | n = 321             | 0.24     | n = 338                     | n = 335             | <0.001   |
| Own toilet (outside or inside house)            | 277 (82.9)         | 327<br>(95.6)       |          | 315<br>(89.7)      | 319<br>(99.1)       |          | 235 (78.1)           | 267 (83.2)          |          | 230 (68.0)                  | 256 (76.4)          |          |
| Shared common toilet/Public toilet              | 6 (1.8)            | 1 (0.3)             |          | 35 (10.0)          | 3 (0.9)             |          | 35 (11.6)            | 26 (8.1)            |          | 23 (6.8)                    | 46 (13.7)           |          |
| No facilities/uses open space                   | 51 (15.3)          | 14 (4.1)            |          | 1 (0.3)            | 0 (0.0)             |          | 31 (10.3)            | 28 (8.7)            |          | 85 (25.1)                   | 33 (9.9)            |          |
| <b>Health seeking behaviour for vaccination</b> | n = 333            | n = 342             | 0.02     | n = 351            | n = 320             | 0.65     | n = 301              | n = 320             | 0.02     | n = 337                     | n = 331             | <0.001   |
| Public                                          | 313 (94.0)         | 334<br>(97.7)       |          | 333<br>(94.9)      | 306<br>(95.6)       |          | 268 (89.0)           | 301 (94.1)          |          | 228 (67.7)                  | 295 (89.1)          |          |
| Private / Others                                | 20 (6.0)           | 8 (2.3)             |          | 18 (5.1)           | 14 (4.4)            |          | 33 (11.0)            | 19 (5.9)            |          | 109 (32.3)                  | 36 (10.9)           |          |

**SIA:** Supplementary Immunization Activities #Chi-square test \* **Kutch house:** Houses made from mud, thatch, or other low-quality materials. **Semi-pucca house:** Houses made from high quality walls with thatched roofs **Pucca house:** Houses made with high quality materials throughout, including the floor, roof, and exterior walls.

**8. Table 4: Weighted seroprevalence (%) of IgG antibodies against measles before and after MR vaccine SIA by selected characteristics among children aged 9 months to < 5 years, 2018-20**

| Characteristics | Hoshiarpur, Punjab    |                        | Dibrugarh, Assam      |                        | Palghar, Maharashtra  |                        | Kanpur Nagar, Uttar Pradesh |                       |
|-----------------|-----------------------|------------------------|-----------------------|------------------------|-----------------------|------------------------|-----------------------------|-----------------------|
|                 | Pre-SIA (n=321)       | Post-SIA (n=339)       | Pre-SIA (n=326)       | Post-SIA (n=311)       | Pre-SIA (n=276)       | Post-SIA (n=324)       | Pre-SIA (n=311)             | Post-SIA (n=319)      |
| <b>Overall</b>  | 81.8<br>(75.5 - 86.8) | 91.5*<br>(85.9 - 95.0) | 88.5<br>(84.6 - 91.5) | 94.3*<br>(91.1 - 96.4) | 83.1<br>(75.4 - 88.8) | 96.0*<br>(91.4 - 98.2) | 80.7<br>(74.1 - 85.9)       | 80.4<br>(74.1 - 85.6) |
| <b>Sex</b>      |                       |                        |                       |                        |                       |                        |                             |                       |
| Female          | 81.7<br>(72.9 - 88.1) | 93.4<br>(88.4 - 96.3)  | 93.7<br>(88.9 - 96.5) | 92.8<br>(83.1 - 97.1)  | 90.2<br>(79.0 - 95.8) | 95.3<br>(90.9 - 97.6)  | 83.1<br>(75.0 - 89.0)       | 83.0<br>(73.1 - 89.8) |
| Male            | 83.6<br>(75.8 - 89.3) | 91.2<br>(81.3 - 96.2)  | 85.5<br>(79.0 - 90.3) | 97.6<br>(93.7 - 99.1)  | 79.9<br>(72.5 - 85.6) | 96.1<br>(86.4 - 99.0)  | 79.7<br>(68.6 - 87.6)       | 78.8<br>(71.6 - 84.6) |
| <b>Locality</b> |                       |                        |                       |                        |                       |                        |                             |                       |
| Rural           | 83.4<br>(76.7 - 88.5) | 92.4<br>(88.2 - 95.3)  | 90.9<br>(86.8 - 93.8) | 96.0<br>(90.5 - 98.3)  | 87.3<br>(77.3 - 93.3) | 94.3<br>(89.4 - 97.0)  | 85.1<br>(76.4 - 91.0)       | 84.8<br>(73.8 - 91.7) |
| Urban Slum      | 60.0<br>(29.8 - 84.2) | 72.8<br>(41.5 - 91.0)  | 84.4<br>(70.8 - 92.4) | 86.7<br>(69.4 - 94.9)  | 80.0<br>(62.0 - 90.7) | 93.7<br>(85.8 - 97.4)  | 75.6<br>(62.5 - 85.1)       | 75.9<br>(66.9 - 83.1) |
| Urban non-slum  | 83.3<br>(70.1 - 91.4) | 91.0<br>(75.6 - 97.0)  | 89.6<br>(49.8 - 98.7) | 97.3<br>(83.2 - 99.6)  | 81.0<br>(69.6 - 88.8) | 98.8<br>(92.2 - 99.8)  | 81.1<br>(69.7 - 88.9)       | 79.8<br>(70.2 - 86.9) |

MR: Measles and Rubella SIA: Supplementary Immunization Activities \* Significant increase in post-SIA seroprevalence compared to pre-SIA (p<0.05)

9. Table 5: Seropositivity against measles by number of MCV doses received among children aged 9 months to <5 years

|                          |   | Total | Measles<br>Positives (n) | %    |
|--------------------------|---|-------|--------------------------|------|
| No. of MCV dose received |   |       |                          |      |
| <b>Pre-SIA</b>           | 0 | 210   | 143                      | 68.1 |
|                          | 1 | 349   | 298                      | 85.4 |
|                          | 2 | 673   | 589                      | 87.5 |
| <b>Post- SIA</b>         | 0 | 42    | 26                       | 61.9 |
|                          | 1 | 175   | 146                      | 83.4 |
|                          | 2 | 300   | 267                      | 89.0 |
|                          | 3 | 776   | 723                      | 93.2 |

**10. Table 6: Weighted seroprevalence (%) of IgG antibodies against measles before and after MR vaccine SIA by selected characteristics among children aged 5 to <15 years, 2018-20**

| Characteristics | Hoshiarpur, Punjab    |                        | Dibrugarh, Assam      |                        | Palghar, Maharashtra  |                        | Kanpur Nagar, Uttar Pradesh |                        |
|-----------------|-----------------------|------------------------|-----------------------|------------------------|-----------------------|------------------------|-----------------------------|------------------------|
|                 | Pre-SIA (n=344)       | Post-SIA (n=345)       | Pre-SIA (n=352)       | Post-SIA (n=325)       | Pre-SIA (n=301)       | Post-SIA (n=321)       | Pre-SIA (n=339)             | Post-SIA (n=335)       |
| <b>Overall</b>  | 63.4<br>(56.6 - 69.7) | 88.7*<br>(82.6 - 92.9) | 75.4<br>(71.0 - 79.3) | 95.9*<br>(91.9 - 98.0) | 74.8<br>(68.8 - 80.0) | 96.5*<br>(92.1 - 98.5) | 84.5<br>(78.1 - 89.4)       | 93.7*<br>(90.9 - 95.7) |
| <b>Sex</b>      |                       |                        |                       |                        |                       |                        |                             |                        |
| Female          | 66.8<br>(58.2 - 74.5) | 88.1<br>(82.3 - 92.2)  | 81.6<br>(75.1 - 86.7) | 98.8<br>(95.3 - 99.7)  | 85.0<br>(72.6 - 92.4) | 95.1<br>(90.5 - 97.5)  | 83.9<br>(76.0 - 89.5)       | 98.1<br>(88.6 - 99.7)  |
| Male            | 59.7<br>(52.4 - 66.6) | 92.2<br>(83.2 - 96.5)  | 69.1<br>(61.9 - 75.5) | 93.2<br>(88.1 - 96.2)  | 67.5<br>(59.8 - 74.5) | 94.3<br>(89.4 - 97.0)  | 87.9<br>(79.0 - 93.4)       | 89.9<br>(84.8 - 93.5)  |
| <b>Locality</b> |                       |                        |                       |                        |                       |                        |                             |                        |
| Rural           | 62.1<br>(54.1 - 69.5) | 90.7<br>(83.2 - 95.0)  | 74.4<br>(68.7 - 79.4) | 96.0<br>(92.8 - 97.8)  | 69.0<br>(61.7 - 75.6) | 94.2<br>(89.3 - 97.0)  | 73.7<br>(63.2 - 82.1)       | 92.8<br>(86.7 - 96.2)  |
| Urban Slum      | 53.9<br>(28.2 - 77.6) | 91.7<br>(58.7 - 98.8)  | 78.9<br>(63.0 - 89.1) | 97.1<br>(82.3 - 99.6)  | 78.4<br>(62.4 - 88.8) | 95.1<br>(87.6 - 98.1)  | 86.4<br>(75.3 - 93.0)       | 99.5<br>(66.3 - 100.0) |
| Urban non-slum  | 70.9<br>(57.7 - 81.3) | 90.3<br>(76.7 - 96.3)  | 80.0<br>(57.2 - 92.3) | 94.9<br>(81.7 - 98.7)  | 77.1<br>(67.6 - 84.4) | 96.1<br>(82.4 - 99.2)  | 90.3<br>(84.2 - 94.2)       | 88.7<br>(80.7 - 93.6)  |

MR: Measles and Rubella SIA: Supplementary Immunization Activities \* Significant increase in post-SIA seroprevalence compared to pre-SIA (p<0.05)

**11. Table 7: Weighted seroprevalence (%) of IgG antibodies against rubella before and after MR vaccine SIA by selected characteristics among children aged 9 months to < 5 years, 2018-20**

| Characteristics | Hoshiarpur, Punjab    |                        | Dibrugarh, Assam      |                        | Palghar, Maharashtra  |                        | Kanpur Nagar, Uttar Pradesh |                        |
|-----------------|-----------------------|------------------------|-----------------------|------------------------|-----------------------|------------------------|-----------------------------|------------------------|
|                 | Pre-SIA (n=321)       | Post-SIA (n=339)       | Pre-SIA (n=326)       | Post-SIA (n=311)       | Pre-SIA (n=276)       | Post-SIA (n=324)       | Pre-SIA (n=311)             | Post-SIA (n=319)       |
| <b>Overall</b>  | 13.0<br>(8.7 - 19.1)  | 87.2*<br>(82.7 - 90.7) | 10.6<br>(6.2 - 17.6)  | 96.5*<br>(91.4 - 98.6) | 21.9<br>(14.5 - 31.7) | 94.6*<br>(86.6 - 97.9) | 13.9<br>(8.3 - 22.6)        | 73.3*<br>(67.5 - 78.4) |
| <b>Sex</b>      |                       |                        |                       |                        |                       |                        |                             |                        |
| Female          | 11.9<br>(5.9 - 22.6)  | 90.3<br>(82.3 - 95.0)  | 11.5<br>(6.6 - 19.1)  | 93.5<br>(83.5 - 97.6)  | 24.8<br>(16.5 - 35.6) | 95.4<br>(87.4 - 98.4)  | 15.8<br>(9.8 - 24.5)        | 70.2<br>(60.7 - 78.3)  |
| Male            | 13.0<br>(7.2 - 22.3)  | 86.3<br>(79.2 - 91.3)  | 9.6<br>(4.6 - 19.1)   | 96.3<br>(88.5 - 98.9)  | 16.5<br>(8.5 - 29.5)  | 96.7<br>(87.1 - 99.2)  | 15.8<br>(9.2 - 25.9)        | 78.1<br>(68.6 - 85.3)  |
| <b>Locality</b> |                       |                        |                       |                        |                       |                        |                             |                        |
| Rural           | 16.0<br>(11.3 - 22.1) | 89.2<br>(83.2 - 93.3)  | 8.3<br>(4.4 - 14.9)   | 94.9<br>(88.7 - 97.8)  | 13.4<br>(7.1 - 23.8)  | 98.7<br>(95.1 - 99.7)  | 12.8<br>(7.4 - 21.2)        | 79.8<br>(71.5 - 86.2)  |
| Urban Slum      | 40.0<br>(15.8 - 70.2) | 81.8<br>(49.3 - 95.4)  | 22.2<br>(12.4 - 36.6) | 89.3<br>(56.7 - 98.2)  | 46.7<br>(29.9 - 64.2) | 90.0<br>(81.3 - 94.9)  | 13.7<br>(4.0 - 37.7)        | 70.6<br>(56.3 - 81.7)  |
| Urban non-slum  | 5.4<br>(0.9 - 25.6)   | 86.4<br>(78.3 - 91.8)  | 11.7<br>(2.1 - 44.9)  | 97.3<br>(83.2 - 99.6)  | 27.5<br>(16.3 - 42.4) | 96.0<br>(72.3 - 99.6)  | 18.7<br>(11.7 - 28.7)       | 69.7<br>(59.4 - 78.3)  |

MR: Measles and Rubella SIA: Supplementary Immunization Activities \* Significant increase in post-SIA seroprevalence compared to pre-SIA (p<0.05)

**12. Table 8: Weighted seroprevalence (%) of IgG antibodies against rubella before and after MR vaccine SIA by selected characteristics among children aged 5 to <15 years, 2018-20**

| Characteristics | Hoshiarpur, Punjab |                     | Dibrugarh, Assam   |                     | Palghar, Maharashtra |                     | Kanpur Nagar, Uttar Pradesh |                     |
|-----------------|--------------------|---------------------|--------------------|---------------------|----------------------|---------------------|-----------------------------|---------------------|
|                 | Pre-SIA (n=344)    | Post-SIA (n=345)    | Pre-SIA (n=352)    | Post-SIA (n=325)    | Pre-SIA (n=301)      | Post-SIA (n=321)    | Pre-SIA (n=339)             | Post-SIA (n=335)    |
| <b>Overall</b>  | 62.2 (55.0 - 68.8) | 97.0 (93.0 - 98.7)* | 48.7 (41.1 - 56.5) | 98.2 (94.5 - 99.4)* | 66.5 (58.8 - 73.3)   | 98.2 (94.8 - 99.4)* | 66.8 (61.2 - 71.9)          | 92.0 (84.9 - 95.9)* |
| <b>Sex</b>      |                    |                     |                    |                     |                      |                     |                             |                     |
| Female          | 65.5 (54.5 - 75.0) | 95.8 (91.5 - 98.0)  | 50.4 (40.6 - 60.3) | 98.0 (89.9 - 99.6)  | 67.0 (55.5 - 76.7)   | 98.8 (95.2 - 99.7)  | 64.5 (56.9 - 71.4)          | 91.1 (85.3 - 94.8)  |
| Male            | 61.3 (54.0 - 68.1) | 95.9 (87.7 - 98.7)  | 49.1 (37.6 - 60.8) | 96.0 (86.4 - 98.9)  | 65.7 (58.1 - 72.5)   | 97.5 (93.5 - 99.0)  | 73.7 (64.6 - 81.2)          | 92.0 (83.1 - 96.4)  |
| <b>Locality</b> |                    |                     |                    |                     |                      |                     |                             |                     |
| Rural           | 65.2 (57.3 - 72.4) | 97.5 (91.1 - 99.3)  | 47.4 (37.6 - 57.3) | 98.3 (92.4 - 99.6)  | 59.9 (48.9 - 70.0)   | 98.1 (94.2 - 99.4)  | 68.4 (58.5 - 76.8)          | 94.2 (82.3 - 98.3)  |
| Urban Slum      | 69.2 (40.9 - 88.0) | NA                  | 50.9 (37.9 - 63.8) | 97.1 (82.3 - 99.6)  | 70.3 (53.9 - 82.7)   | 98.8 (91.8 - 99.8)  | 68.3 (53.8 - 79.9)          | 92.9 (82.3 - 97.3)  |
| Urban non-slum  | 49.0 (34.0 - 64.2) | 93.3 (86.6 - 96.8)  | 65.0 (42.5 - 82.3) | 94.9 (81.7 - 98.7)  | 74.0 (64.3 - 81.8)   | 97.6 (91.0 - 99.4)  | 69.4 (61.5 - 76.4)          | 85.6 (77.1 - 91.3)  |

MR: Measles and Rubella SIA: Supplementary Immunization Activities Not applicable since no urban slum clusters surveyed \* Significant increase in post-SIA seroprevalence compared to pre-SIA (p<0.05)



**13. Table 9: Number (%) of sera samples with equivocal results**

|                   | Pre-SIA serosurvey n % | Post-SIA serosurvey n % |
|-------------------|------------------------|-------------------------|
| <b>Measles</b>    |                        |                         |
| 9 months-<5 years | 13% (160/1234)         | 8% (103/1293)           |
| 5-<15 years       | 14% (187/1336)         | 6% (80/1326)            |
| <b>Rubella</b>    |                        |                         |
| 9 months-<5 years | 0.1% (1/1234)          | 0% (0/1293)             |
| 5-<15 years       | 0.6% (8/1336)          | 0% (0/1326)             |

**14. Table 10: Weighted overall seroprevalence (%) of IgG antibodies against measles and rubella before and after MR vaccine SIA among considering equivocal samples as test negative**

| Seroprevalence                                        | Hoshiarpur, Punjab    |                       | Dibrugarh, Assam      |                       | Palghar, Maharashtra  |                       | Kanpur Nagar, Uttar Pradesh |                       |
|-------------------------------------------------------|-----------------------|-----------------------|-----------------------|-----------------------|-----------------------|-----------------------|-----------------------------|-----------------------|
|                                                       | Pre-SIA               | Post-SIA              | Pre-SIA               | Post-SIA              | Pre-SIA               | Post-SIA              | Pre-SIA                     | Post-SIA              |
| Overall measles seroprevalence (9 months to <5 years) | 63.4<br>(57.4 - 69.1) | 83.6<br>(77.2 - 88.5) | 71.8<br>(67.5 - 75.7) | 90.7<br>(85.6 - 94.1) | 74.9<br>(66.7 - 81.7) | 88.0<br>(82.4 - 92.0) | 68.2<br>(60.0 - 75.4)       | 68.6<br>(61.4 - 75.0) |
| Overall measles seroprevalence (5 to <15 years)       | 44.4<br>(36.3 - 52.8) | 82.9<br>(76.3 - 88.0) | 55.5<br>(48.6 - 62.3) | 91.6<br>(85.7 - 95.2) | 63.1<br>(56.1 - 69.6) | 91.0<br>(86.1 - 94.3) | 80.9<br>(73.2 - 86.7)       | 87.0<br>(82.3 - 90.6) |
| Overall rubella seroprevalence (9 months to <5 years) | 13.0<br>(8.7 - 19.1)  | 87.2<br>(82.7 - 90.7) | 10.6<br>(6.2 - 17.6)  | 96.5<br>(91.4 - 98.6) | 21.8<br>(14.6 - 31.2) | 94.6<br>(86.6 - 97.9) | 13.9<br>(8.3 - 22.6)        | 73.3<br>(67.5 - 78.4) |
| Overall rubella seroprevalence (5 to <15 years)       | 62.2<br>(55.0 - 68.8) | 97.0<br>(93.0 - 98.7) | 48.7<br>(41.1 - 56.5) | 98.2<br>(94.5 - 99.4) | 64.8<br>(57.1 - 71.8) | 98.2<br>(94.8 - 99.4) | 65.6<br>(59.9 - 71.0)       | 92.0<br>(84.9 - 95.9) |

**15. Table 11: Factors associated with seronegative status against measles or rubella among children aged 9 months to <5 years in post-SIA survey, 2018-2020**

| Characteristics                       | Measles            |                      |                              |                      | Rubella            |                      |                              |                      |
|---------------------------------------|--------------------|----------------------|------------------------------|----------------------|--------------------|----------------------|------------------------------|----------------------|
|                                       | N (% seronegative) | P-value <sup>1</sup> | Adjusted Odds ratio (95% CI) | p value <sup>2</sup> | N (% seronegative) | P-value <sup>3</sup> | Adjusted Odds ratio (95% CI) | P-value <sup>4</sup> |
| <b>Sex</b>                            |                    |                      |                              |                      |                    |                      |                              |                      |
| Female                                | 634 (9.6)          | 0.551                | 0.91 (0.62-1.35)             | 0.651                | 634 (14.4)         | 0.208                | 1.25 (0.87-1.82)             | 0.233                |
| Male                                  | 659 (10.6)         |                      | REF                          |                      | 659 (12.0)         |                      | REF                          |                      |
| <b>Religion</b>                       |                    |                      |                              |                      |                    |                      |                              |                      |
| Hindu                                 | 1115 (9.5)         | 0.009                | REF                          |                      | 1115 (12.6)        | <0.0001              | REF                          |                      |
| Muslim / Christian                    | 66 (21.2)          |                      | 1.64 (0.78-3.47)             | 0.192                | 66 (31.8)          |                      | 2.95 (1.45-5.99)             | 0.003                |
| Sikhs / Buddhist / Jain               | 108 (9.3)          |                      | 1.45 (0.65-3.22)             | 0.36                 | 108 (8.3)          |                      | 0.74 (0.33-1.69)             | 0.476                |
| <b>Caste</b>                          |                    |                      |                              |                      |                    |                      |                              |                      |
| General / Other Backward Class / None | 892 (9.4)          | 0.266                | -                            | -                    | 892 (13.7)         | 0.28                 | -                            |                      |
| Scheduled Caste / Scheduled Tribe     | 384 (11.5)         |                      | -                            | -                    | 384 (11.5)         |                      | -                            |                      |
| <b>Mother's Occupation</b>            |                    |                      |                              |                      |                    |                      |                              |                      |
| Employed                              | 271 (8.9)          | 0.466                | -                            | -                    | 271 (9.2)          | 0.034                | 1.39 (0.78-2.45)             | 0.261                |
| Home maker / Unemployed               | 1014 (10.4)        |                      | -                            | -                    | 1014 (14.1)        |                      | REF                          |                      |
| <b>Mother's education</b>             |                    |                      |                              |                      |                    |                      |                              |                      |
| Prof/honors/graduate                  | 220 (7.7)          | 0.024                | REF                          |                      | 220 (10.9)         | 0.001                | REF                          |                      |
| Senior/higher secondary               | 181 (7.7)          |                      | 1.24 (0.58-2.68)             | 0.581                | 181 (6.6)          |                      | 0.65 (0.29-1.45)             | 0.29                 |
| High/Middle School                    | 503 (9.7)          |                      | 1.54 (0.83-2.85)             | 0.174                | 503 (12.7)         |                      | 1.58 (0.87-2.87)             | 0.133                |
| Primary                               | 211 (10.0)         |                      | 1.56 (0.73-3.35)             | 0.255                | 211 (15.6)         |                      | 2.51 (1.23-5.13)             | 0.012                |
| Illiterate                            | 172 (16.9)         |                      | 1.49 (0.67-3.33)             | 0.333                | 172 (20.9)         |                      | 2.12 (0.97-4.65)             | 0.06                 |
| <b>Type of house</b>                  |                    |                      |                              |                      |                    |                      |                              |                      |
| Kutchha                               | 343 (9.3)          | 0.695                | -                            | -                    | 343 (11.1)         | 0.033                | 1.33 (0.63-2.81)             | 0.458                |
| Semi-pucca                            | 282 (11.3)         |                      | -                            | -                    | 282 (17.7)         |                      | 1.46 (0.84-2.52)             | 0.177                |
| Pucca                                 | 664 (9.9)          |                      | -                            | -                    | 664 (12.3)         |                      | REF                          |                      |

<sup>1</sup>&<sup>3</sup> - chi square test; <sup>2</sup>adjusted for sex, religion, mother's education, type of residence, toilet, number of vaccine doses received, and district; <sup>4</sup>adjusted for sex, religion, mother's occupation/education, type of house & residence, toilet, number of vaccine doses received, MR campaign dose coverage and district

**Continued Table 11: Factors associated with seronegative status against measles or rubella among children aged 9 months to <5 years in post-SIA survey, 2018-20**

| Characteristics                                                                                             | Measles            |         |                              |         | Rubella            |         |                              |         |
|-------------------------------------------------------------------------------------------------------------|--------------------|---------|------------------------------|---------|--------------------|---------|------------------------------|---------|
|                                                                                                             | N (% seronegative) | P-value | Adjusted Odds ratio (95% CI) | p value | N (% seronegative) | P-value | Adjusted Odds ratio (95% CI) | P-value |
| <b>Type of Residence</b>                                                                                    |                    |         |                              |         |                    |         |                              |         |
| Rural                                                                                                       | 741 (7.7)          | <0.0001 | REF                          |         | 741 (9.4)          | <0.0001 | REF                          |         |
| Urban Slum                                                                                                  | 237 (16.9)         |         | 1.58 (0.92 - 2.72)           | 0.101   | 237 (21.1)         |         | 1.26 (0.73 - 2.19)           | 0.407   |
| Urban Non-Slum                                                                                              | 315 (10.8)         |         | 1.70 (1.01 - 2.87)           | 0.046   | 315 (15.9)         |         | 1.96 (1.18 - 3.25)           | 0.009   |
| <b>Toilet</b>                                                                                               |                    |         |                              |         |                    |         |                              |         |
| Own toilet (outside or inside house)                                                                        | 1094 (8.0)         | <0.0001 | REF                          |         | 1094 (10.8)        | <0.0001 | REF                          |         |
| Shared common toilet/Public toilet                                                                          | 104 (17.3)         |         | 1.25 (0.63-2.45)             | 0.525   | 104 (26.9)         |         | 1.23 (0.64-2.35)             | 0.542   |
| No facilities/uses open space                                                                               | 91 (26.4)          |         | 3.10 (1.57-6.11)             | 0.001   | 91 (26.4)          |         | 1.67 (0.78-3.61)             | 0.189   |
| <b>Health seeking behaviour vaccination</b>                                                                 |                    |         |                              |         |                    |         |                              |         |
| Public                                                                                                      | 1193 (9.7)         | 0.4     | -                            |         | 1193 (13.2)        | 0.153   | -                            |         |
| Private / Others                                                                                            | 88 (12.5)          |         | -                            |         | 88 (8.0)           |         | -                            |         |
| <b>Total number of measles containing doses received from either campaign or routine, by card or recall</b> |                    |         |                              |         |                    |         |                              |         |
| 0 Dose                                                                                                      | 42 (38.1)          | <0.0001 | 4.45 (2.00 - 9.87)           | <0.0001 | -                  | -       | -                            | -       |
| 1 Dose                                                                                                      | 175 (16.6)         |         | 2.97 (1.71 - 5.15)           | <0.0001 | -                  | -       | -                            | -       |
| 2 Doses                                                                                                     | 300 (11.0)         |         | 1.51 (0.93 - 2.44)           | 0.096   | -                  | -       | -                            | -       |
| 3 Doses                                                                                                     | 776 (6.8)          |         | REF                          |         | -                  | -       | -                            | -       |
| <b>MR Campaign Coverage</b>                                                                                 |                    |         |                              |         |                    |         |                              |         |
| MR Campaign dose documented or by recall                                                                    | -                  |         | -                            |         | 1097 (7.9)         | <0.0001 | REF                          |         |
| No evidence of MR campaign dose by either card or recall                                                    | -                  |         | -                            |         | 196 (42.3)         |         | 6.77 (4.52 - 10.14)          | <0.0001 |
| <b>District</b>                                                                                             |                    |         |                              |         |                    |         |                              |         |
| Dibrugarh                                                                                                   | 311 (5.5)          | <0.0001 | REF                          |         | 311 (7.7)          | <0.0001 | REF                          |         |
| Hoshiarpur                                                                                                  | 339 (10.0)         |         | 1.81 (0.88 - 3.69)           | 0.106   | 339 (12.4)         |         | 2.48 (1.15-5.37)             | 0.021   |
| Kanpur Nagar                                                                                                | 319 (20.4)         |         | 3.59 (1.86 - 6.93)           | <0.0001 | 319 (27.0)         |         | 2.98 (1.49-5.97)             | 0.002   |
| Palghar                                                                                                     | 324 (4.6)          |         | 0.77 (0.35 - 1.67)           | 0.505   | 324 (5.6)          |         | 0.71 (0.32-1.58)             | 0.403   |

**16. Table 12: Factors associated with seronegative status against measles or rubella among children aged 5 to <15 years in post-SIA survey, 2018-2020**

| Characteristics                       | Measles            |                      |                              |                      | Rubella            |                      |                              |                      |
|---------------------------------------|--------------------|----------------------|------------------------------|----------------------|--------------------|----------------------|------------------------------|----------------------|
|                                       | N (% seronegative) | P-value <sup>1</sup> | Adjusted Odds ratio (95% CI) | p value <sup>2</sup> | N (% seronegative) | P-value <sup>3</sup> | Adjusted Odds ratio (95% CI) | P-value <sup>4</sup> |
| <b>Sex</b>                            |                    |                      |                              |                      |                    |                      |                              |                      |
| Female                                | 641 (5.8)          | 0.037                | 0.64 (0.41-0.98)             | 0.042                | 641 (4.5)          | 0.234                | 0.84 (0.50 - 1.43)           | 0.526                |
| Male                                  | 685 (8.8)          |                      | REF                          |                      | 685 (6.0)          |                      | REF                          |                      |
| <b>Religion</b>                       |                    |                      |                              |                      |                    |                      |                              |                      |
| Hindu                                 | 1119 (7.3)         | 0.214                |                              |                      | 1119 (5.1)         | 0.725                |                              |                      |
| Muslim / Christian                    | 83 (3.6)           |                      |                              |                      | 83 (4.8)           |                      |                              |                      |
| Sikhs / Buddhist / Jain               | 118 (10.2)         |                      |                              |                      | 118 (6.8)          |                      |                              |                      |
| <b>Caste</b>                          |                    |                      |                              |                      |                    |                      |                              |                      |
| General / Other Backward Class / None | 914 (6.8)          | 0.24                 |                              |                      | 914 (5.7)          | 0.224                |                              |                      |
| Scheduled Caste / Scheduled Tribe     | 394 (8.6)          |                      |                              |                      | 394 (4.1)          |                      |                              |                      |
| <b>Mother's Occupation</b>            |                    |                      |                              |                      |                    |                      |                              |                      |
| Employed                              | 285 (8.1)          | 0.626                |                              |                      | 285 (5.6)          | 0.75                 |                              |                      |
| Home maker / Unemployed               | 1012 (7.2)         |                      |                              |                      | 1012 (5.1)         |                      |                              |                      |
| <b>Mother's education</b>             |                    |                      |                              |                      |                    |                      |                              |                      |
| Prof/honors/graduate                  | 131 (7.6)          | 0.839                |                              |                      | 131 (5.3)          | 0.942                |                              |                      |
| Senior/higher secondary               | 146 (7.5)          |                      |                              |                      | 146 (5.5)          |                      |                              |                      |
| High/Middle School                    | 520 (7.9)          |                      |                              |                      | 520 (4.6)          |                      |                              |                      |
| Primary                               | 266 (5.6)          |                      |                              |                      | 266 (5.6)          |                      |                              |                      |
| Illiterate                            | 234 (7.7)          |                      |                              |                      | 234 (6.0)          |                      |                              |                      |
| <b>Type of house</b>                  |                    |                      |                              |                      |                    |                      |                              |                      |
| Kutchra                               | 302 (5.0)          | 0.008                | 0.97 (0.44-2.11)             | 0.93                 | 302 (5.0)          | 0.928                |                              |                      |
| Semi-pucca                            | 320 (5.0)          |                      | 0.71 (0.38-1.34)             | 0.286                | 320 (5.6)          |                      |                              |                      |
| Pucca                                 | 698 (9.5)          |                      | REF                          |                      | 698 (5.2)          |                      |                              |                      |

<sup>1</sup>&<sup>3</sup> - chi square test; <sup>2</sup>adjusted for sex, type of house, residence, MR campaign coverage, and district; <sup>4</sup>adjusted for sex, type of residence, MR campaign dose coverage and district

**Continued Table 12: Factors associated with seronegative status against measles or rubella among children aged 5 to <15 years in post-SIA survey, 2018-2020**

| Characteristics                                          | Measles            |         |                              |         | Rubella            |         |                              |         |
|----------------------------------------------------------|--------------------|---------|------------------------------|---------|--------------------|---------|------------------------------|---------|
|                                                          | N (% seronegative) | P-value | Adjusted Odds ratio (95% CI) | p value | N (% seronegative) | P-value | Adjusted Odds ratio (95% CI) | P-value |
| <b>Type of Residence</b>                                 |                    |         |                              |         |                    |         |                              |         |
| Rural                                                    | 761 (7.2)          | 0.153   | REF                          |         | 761 (4.3)          | 0.073   | REF                          |         |
| Urban Slum                                               | 241 (5.0)          |         | 0.63 (0.31 - 1.27)           | 0.197   | 241 (5.0)          |         | 0.49 (0.22 - 1.07)           | 0.073   |
| Urban Non-Slum                                           | 324 (9.3)          |         | 1.05 (0.62 - 1.76)           | 0.864   | 324 (7.7)          |         | 1.31 (0.73 - 2.37)           | 0.366   |
| <b>Toilet</b>                                            |                    |         |                              |         |                    |         |                              |         |
| Own toilet (outside or inside house)                     | 1169 (7.4)         | 0.936   |                              |         | 1169 (5.1)         | 0.846   |                              |         |
| Shared common toilet/Public toilet                       | 76 (6.6)           |         |                              |         | 76 (5.3)           |         |                              |         |
| No facilities/uses open space                            | 75 (6.7)           |         |                              |         | 75 (6.7)           |         |                              |         |
| <b>Health seeking behaviour vaccination</b>              |                    |         |                              |         |                    |         |                              |         |
| Public                                                   | 1236 (7.2)         | 0.536   |                              |         | 1236 (5.2)         | 0.995   |                              |         |
| Private / Others                                         | 77 (9.1)           |         |                              |         | 77 (5.2)           |         |                              |         |
| <b>MR Campaign Coverage</b>                              |                    |         |                              |         |                    |         |                              |         |
| MR Campaign dose documented or by recall                 | 1149 (6.1)         | <0.0001 | REF                          |         | 1149 (2.5)         | <0.0001 | REF                          |         |
| No evidence of MR campaign dose by either card or recall | 176 (15.3)         |         | 2.74 (1.66 - 4.52)           | <0.0001 | 176 (23.3)         |         | 10.7 (6.21 - 18.3)           | <0.0001 |
| <b>District</b>                                          |                    |         |                              |         |                    |         |                              |         |
| Dibrugarh                                                | 325 (4.0)          |         | REF                          |         | 325 (4.3)          | <0.0001 | REF                          |         |
| Hoshiarpur                                               | 345 (11.9)         |         | 2.81 (1.23 - 6.42)           | 0.014   | 345 (4.3)          |         | 0.72 (0.33 - 1.58)           | 0.416   |
| Kanpur Nagar                                             | 335 (7.8)          |         | 1.84 (0.81 - 4.18)           | 0.147   | 335 (10.4)         |         | 1.79 (0.89 - 3.62)           | 0.105   |
| Palghar                                                  | 321 (5.3)          |         | 1.59 (0.70 - 3.65)           | 0.271   | 321 (1.9)          |         | 0.52 (0.19 - 1.42)           | 0.205   |

**17. Table 13: Factors associated with seronegative status against measles or rubella among children aged 9 months to <5 years in pre-SIA survey, 2018-2020**

| Characteristics                       | Measles            |         |                              |         | Rubella            |         |                              |         |
|---------------------------------------|--------------------|---------|------------------------------|---------|--------------------|---------|------------------------------|---------|
|                                       | N (% seronegative) | p value | Adjusted Odds ratio (95% CI) | p.value | N (% seronegative) | p value | Adjusted Odds ratio (95% CI) | p value |
| <b>Sex</b>                            |                    |         |                              |         |                    |         |                              |         |
| Female                                | 636(14.3)          | 0.036   | 0.63(0.46 - 0.87)            | 0.005   | 636(82.2)          | 0.520   |                              |         |
| Male                                  | 598(18.7)          |         | REF                          |         | 598(83.6)          |         |                              |         |
| <b>Religion</b>                       |                    |         |                              |         |                    |         |                              |         |
| Hindu                                 | 1048(15.3)         | 0.004   | REF                          |         | 1048(83.8)         | 0.010   | REF                          |         |
| Muslim / Christian                    | 82(29.3)           |         | 2.07(1.20 - 3.58)            | 0.009   | 82(70.7)           |         | 0.54(0.31 - 0.95)            | 0.031   |
| Sikhs / Buddhist / Jain               | 85(18.8)           |         | 1.37(0.71 - 2.62)            | 0.345   | 85(83.5)           |         | 0.94(0.48 - 1.85)            | 0.857   |
| <b>Caste</b>                          |                    |         |                              |         |                    |         |                              |         |
| General / Other Backward Class / None | 781(15.7)          | 0.366   |                              |         | 781(81.9)          | 0.244   |                              |         |
| Scheduled Caste / Scheduled Tribe     | 422(17.8)          |         |                              |         | 422(84.6)          |         |                              |         |
| <b>Mother's Occupation</b>            |                    |         |                              |         |                    |         |                              |         |
| Employed                              | 162(13.6)          | 0.308   |                              |         | 162(87.7)          | 0.081   | REF                          |         |
| Home maker / Unemployed               | 1068(16.8)         |         |                              |         | 1068(82.1)         |         | 0.76(0.43 - 1.34)            | 0.34    |
| <b>Mother's education</b>             |                    |         |                              |         |                    |         |                              |         |
| Prof/honors/graduate                  | 148(16.2)          | 0.922   |                              |         | 148(70.9)          | <0.001  | REF                          |         |
| Senior/higher secondary               | 128(14.1)          |         |                              |         | 128(79.7)          |         | 1.54(0.84 - 2.81)            | 0.163   |
| High/Middle School                    | 538(16.5)          |         |                              |         | 538(86.1)          |         | 2.75(1.69 - 4.47)            | <0.001  |
| Primary                               | 172(15.7)          |         |                              |         | 172(82.6)          |         | 2.10(1.17 - 3.79)            | 0.014   |
| Illiterate                            | 242(17.8)          |         |                              |         | 242(84.7)          |         | 2.10(1.19 - 3.72)            | 0.011   |
| <b>Type of house</b>                  |                    |         |                              |         |                    |         |                              |         |
| Kutcha                                | 252(11.9)          | 0.089   | 1.16(0.64 - 2.08)            | 0.627   | 252(87.3)          | 0.010   | 1.20(0.70 - 2.08)            | 0.506   |
| Semi-pucca                            | 359(18.1)          |         | 1.30(0.83 - 2.04)            | 0.253   | 359(85.2)          |         | 1.37(0.87 - 2.14)            | 0.173   |
| Pucca                                 | 606(17.3)          |         | REF                          |         | 606(79.7)          |         | REF                          |         |

**Continued Table 13: Factors associated with seronegative status against measles or rubella among children aged 9 months to <5 years in pre-SIA survey, 2018-2020**

| Characteristics                                                                                             | N (% seronegative) | p value | Adjusted Odds ratio (95% CI) | p.value | N (% seronegative) | p value | Adjusted Odds ratio (95% CI) | p value |
|-------------------------------------------------------------------------------------------------------------|--------------------|---------|------------------------------|---------|--------------------|---------|------------------------------|---------|
| <b>Type of Residence</b>                                                                                    |                    |         |                              |         |                    |         |                              |         |
| Rural                                                                                                       | 783(14.0)          | 0.008   | REF                          |         | 783(85.8)          | <0.001  | REF                          |         |
| Urban Slum                                                                                                  | 168(22.6)          |         | 1.43(0.87 - 2.37)            | 0.160   | 168(73.8)          |         | 0.49(0.31 - 0.78)            | 0.002   |
| Urban Non-Slum                                                                                              | 283(19.4)          |         | 1.22(0.77 - 1.94)            | 0.398   | 283(80.2)          |         | 1.12(0.71 - 1.77)            | 0.628   |
| <b>Toilet</b>                                                                                               |                    |         |                              |         |                    |         |                              |         |
| Own toilet (outside or inside house)                                                                        | 944(15.6)          | 0.179   | REF                          |         | 944(82.6)          | 0.874   |                              |         |
| Shared common toilet/Public toilet                                                                          | 102(22.5)          |         | 1.40(0.78 - 2.50)            | 0.261   | 102(83.3)          |         |                              |         |
| No facilities/uses open space                                                                               | 171(17.5)          |         | 0.89(0.53 - 1.50)            | 0.664   | 171(84.2)          |         |                              |         |
| <b>Health seeking behaviour vaccination</b>                                                                 |                    |         |                              |         |                    |         |                              |         |
| Public                                                                                                      | 1079(15.8)         | 0.098   | REF                          |         | 1079(84.3)         | <0.001  | REF                          |         |
| Private / Others                                                                                            | 136(21.3)          |         | 1.36(0.82 - 2.27)            | 0.232   | 136(71.3)          |         | 0.51(0.32 - 0.82)            | 0.006   |
| <b>Total number of measles containing doses received from either campaign or routine, by card or recall</b> |                    |         |                              |         |                    |         |                              |         |
| 0 Dose                                                                                                      | 210(31.9)          | <0.001  | 3.32(2.24 - 4.92)            | <0.001  | -                  | -       | -                            | -       |
| 1 Dose                                                                                                      | 349(14.6)          |         | 1.38(0.94 - 2.04)            | 0.101   | -                  | -       | -                            | -       |
| 2 Doses                                                                                                     | 673(12.5)          |         | REF                          |         | -                  | -       | -                            | -       |
| <b>District</b>                                                                                             |                    |         |                              |         |                    |         |                              |         |
| Dibrugarh                                                                                                   | 326(10.1)          |         | REF                          |         | 326(87.4)          |         | REF                          |         |
| Hoshiarpur                                                                                                  | 321(18.4)          | 0.003   | 2.32(1.28 - 4.21)            | 0.006   | 321(84.1)          | 0.006   | 0.98(0.57 - 1.71)            | 0.934   |
| Kanpur Nagar                                                                                                | 311(20.6)          |         | 1.51(0.83 - 2.77)            | 0.177   | 311(82.3)          |         | 1.14(0.66 - 1.99)            | 0.635   |
| Palghar                                                                                                     | 276(17.0)          |         | 1.55(0.89 - 2.69)            | 0.122   | 276(76.8)          |         | 0.49(0.29 - 0.81)            | 0.05    |



18. Table 14: Factors associated with seronegative status against measles or rubella among children aged 5 years to <15 years in pre-SIA survey, 2018-2020

| Characteristics                       | N (% seronegative) | p value | Adjusted Odds ratio (95% CI) | p value | N (% seronegative) | p value | Adjusted Odds ratio (95% CI) | p value           |
|---------------------------------------|--------------------|---------|------------------------------|---------|--------------------|---------|------------------------------|-------------------|
| <b>Sex</b>                            |                    |         |                              |         |                    |         |                              |                   |
| Female                                | 638(22.4)          | 0.002   | 0.66(0.51 - 0.86)            | 0.002   | 638(39.7)          |         | 0.599                        |                   |
| Male                                  | 698(29.8)          |         | REF                          |         | 698(38.3)          |         |                              |                   |
| <b>Religion</b>                       |                    |         |                              |         |                    |         |                              |                   |
| Hindu                                 | 1133(26.3)         | 0.002   | REF                          |         | 1133(39.6)         |         | 0.413                        |                   |
| Muslim / Christian                    | 84(13.1)           |         | 0.50(0.24 - 1.00)            | 0.052   | 84(34.5)           |         |                              |                   |
| Sikhs / Buddhist / Jain               | 107(35.5)          |         | 0.88(0.54 - 1.42)            | 0.592   | 107(34.6)          |         |                              |                   |
| <b>Caste</b>                          |                    |         |                              |         |                    |         |                              |                   |
| General / Other Backward Class / None | 846(24.6)          | 0.084   | REF                          |         | 846(38.1)          |         | 0.375                        |                   |
| Scheduled Caste / Scheduled Tribe     | 466(29.0)          |         | 1.03(0.76 - 1.38)            | 0.872   | 466(40.6)          |         |                              |                   |
| <b>Mother's Occupation</b>            |                    |         |                              |         |                    |         |                              |                   |
| Employed                              | 242(25.6)          | 0.813   |                              |         | 242(38.8)          |         | 0.999                        |                   |
| Home maker / Unemployed               | 1066(26.4)         |         |                              |         | 1066(38.8)         |         |                              |                   |
| <b>Mother's education</b>             |                    |         |                              |         |                    |         |                              |                   |
| Prof/honors/graduate                  | 132(25.0)          | 0.102   | REF                          |         | 132(31.8)          |         | 0.001                        | REF               |
| Senior/higher secondary               | 111(30.6)          |         | 0.81(0.44 - 1.51)            | 0.510   | 111(27.0)          |         | 0.62(0.34 - 1.12)            | 0.115             |
| High/Middle School                    | 526(29.3)          |         | 1.00 (0.61 - 1.63)           | 0.989   | 526(45.1)          |         | 1.29(0.83 - 2.02)            | 0.257             |
| Primary                               | 212(22.6)          |         | 0.71(0.40 - 1.25)            | 0.235   | 212(35.8)          |         | 0.95(0.57 - 1.58)            | 0.842             |
| Illiterate                            | 327(22.3)          |         | 0.74(0.44 - 1.27)            | 0.278   | 327(37.6)          |         | 0.96(0.59 - 1.57)            | 0.866             |
| <b>Type of house</b>                  |                    |         |                              |         |                    |         |                              |                   |
| Kutchha                               | 281(23.1)          | 0.405   |                              |         | 281(46.6)          |         | 0.009                        | 1.13(0.78 - 1.63) |
| Semi-pucca                            | 382(27.5)          |         |                              |         | 382(38.2)          |         | 1.14(0.83 - 1.57)            | 0.41              |
| Pucca                                 | 661(26.8)          |         |                              |         | 661(36.0)          |         | REF                          |                   |

**Continued Table 14: Factors associated with seronegative status against measles or rubella among children aged 5 to <15 years in pre-SIA survey, 2018-2020**

| Characteristics                             | Measles            |         |                              |         | Rubella            |         |                              |         |
|---------------------------------------------|--------------------|---------|------------------------------|---------|--------------------|---------|------------------------------|---------|
|                                             | N (% seronegative) | p value | Adjusted Odds ratio (95% CI) | p value | N (% seronegative) | p value | Adjusted Odds ratio (95% CI) | p value |
| <b>Type of Residence</b>                    |                    |         |                              |         |                    |         |                              |         |
| Rural                                       | 819(31.1)          | <0.001  | REF                          |         | 819(41.8)          | 0.020   | REF                          |         |
| Urban Slum                                  | 202(19.8)          |         | 0.77(0.51 - 1.17)            | 0.220   | 202(36.6)          |         | 0.92(0.65 - 1.31)            | 0.655   |
| Urban Non-Slum                              | 315(17.8)          |         | 0.56(0.38 - 0.83)            | 0.004   | 315(33.0)          |         | 0.99(0.70 - 1.40)            | 0.956   |
| <b>Toilet</b>                               |                    |         |                              |         |                    |         |                              |         |
| Own toilet (outside or inside house)        | 1057(26.3)         | 0.975   |                              |         | 1057(38.3)         | 0.584   |                              |         |
| Shared common toilet/Public toilet          | 99(25.3)           |         |                              |         | 99(43.4)           |         |                              |         |
| No facilities/uses open space               | 168(26.2)          |         |                              |         | 168(39.9)          |         |                              |         |
| <b>Health seeking behaviour vaccination</b> |                    |         |                              |         |                    |         |                              |         |
| Public                                      | 1142(27.4)         | 0.160   |                              |         | 1142(40.7)         | 0.001   | REF                          |         |
| Private / Others                            | 180(18.9)          |         |                              |         | 180(27.8)          |         | 0.70(0.47 - 1.04)            | 0.081   |
| <b>District</b>                             |                    |         |                              |         |                    |         |                              |         |
| Dibrugarh                                   | 352(24.7)          | <0.001  | REF                          |         | 352(50.6)          | <0.001  | REF                          |         |
| Hoshiarpur                                  | 344(37.2)          |         | 1.82(1.24 - 2.69)            | 0.002   | 344(37.8)          |         | 0.68(0.47 - 0.97)            | 0.035   |
| Kanpur Nagar                                | 339(15.9)          |         | 0.74(0.48 - 1.14)            | 0.170   | 339(31.6)          |         | 0.53(0.36 - 0.78)            | 0.001   |
| Palghar                                     | 301(27.2)          |         | 1.29(0.86 - 1.93)            | 0.213   | 301(34.9)          |         | 0.54(0.37 - 0.76)            | 0.001   |

19. Table 15. Summary of risk factors associated with measles and rubella seronegativity in pre and post SIA serosurveys

|                                              | Pre-SIA                                            | Post-SIA                             |
|----------------------------------------------|----------------------------------------------------|--------------------------------------|
| <b>Measles<br/>(9 months to &lt;5 years)</b> | Male sex                                           | -                                    |
|                                              | Muslim/Christian                                   | -                                    |
|                                              | '0' MCV dose                                       | '0' or '1' MCV dose                  |
|                                              | Hoshiarpur                                         | -                                    |
|                                              | -                                                  | No toilet facilities/uses open space |
|                                              | -                                                  | Kanpur Nagar                         |
| <b>Measles<br/>(5 to &lt;15 years)</b>       | Male sex                                           | Female sex                           |
|                                              | Muslim/Christian                                   | -                                    |
|                                              | Hoshiarpur                                         | Hoshiarpur                           |
|                                              | -                                                  | Non-receipt of SIA dose              |
| <b>Rubella<br/>(9 months to &lt;5 years)</b> | Mothers Education (high school/primary/Illiterate) | Mothers education (primary)          |
|                                              | Palghar                                            | -                                    |
|                                              | -                                                  | Urban Non-slum                       |
|                                              | -                                                  | Non-receipt of SIA dose              |
|                                              | -                                                  | Muslim/Christian                     |
|                                              | -                                                  | Kanpur Nagar and Hoshiarpur          |
| <b>Rubella (5 to &lt;15 years)</b>           | -                                                  | Non-receipt of SIA dose              |

**20. Table 16: Children age 12-23 months who have received measles vaccine (%) in the surveyed districts from National Family Health Survey (NFHS)**

|                                 | <b>Hoshiarpur, Punjab</b> | <b>Dibrugarh, Assam</b> | <b>Palghar, Maharashtra</b> | <b>Kanpur Nagar,<br/>Uttar Pradesh</b> |
|---------------------------------|---------------------------|-------------------------|-----------------------------|----------------------------------------|
| NFHS-4 (2015-2016) -One dose    | 95.2                      | 92.6                    | 72.3*                       | 74.0                                   |
| NFHS-5 (2019-2020)- First dose  | 95.4                      | 97.8                    | 100                         | 78.6                                   |
| NFHS-5 (2019-2020)- Second dose | 29.2                      | 35.1                    | 31.3                        | 32.2                                   |

\*Earlier Palghar was part of Thane district

21. Table 17: Comparison of predicted seroprevalence from the MCV coverage estimates and observed seroprevalence estimated during post-SIA serosurvey

|                                               | Hoshiarpur    | Dibrugarh     | Palghar       | Kanpur        |
|-----------------------------------------------|---------------|---------------|---------------|---------------|
| <b>mcv1 (%)</b>                               | 95.8          | 98.8          | 98.9          | 93.8          |
| <b>mcv2 (%)</b>                               | 84.9          | 71.2          | 90.7          | 83.4          |
| <b>Predicted measles seroprevalence</b>       |               |               |               |               |
| $(mcv1*mcv2*ve2) + (mcv1*(1-mcv2)*ve1)^a$     | 91.0          | 92.1          | 94.7          | 88.9          |
| $(ve1*mcv1)+(ve2*mcv2)-(mcv2*ve1*ve2*mcv1)^b$ | 96.6          | 94.7          | 97.9          | 95.9          |
| <b>Observed measles prevalence</b>            | 91.5          | 94.3          | 96.0          | 80.4          |
|                                               | (85.9 - 95.0) | (91.1 - 96.4) | (91.4 - 98.2) | (74.1 - 85.6) |

ve1=84%; ve2=97%; <sup>a</sup>dependence assumption: receipt of MCV2 is dependent on receipt of MCV1 <sup>b</sup>Independence assumption: Receipt of MCV2 is independent of MCV1 (randomly distributed throughout population)

## 22. Strengthening the Reporting of Observational Studies in Epidemiology (STROBE) checklist

|                           | Item No | Recommendation                                                                                                                                                                       | Location in the manuscript |
|---------------------------|---------|--------------------------------------------------------------------------------------------------------------------------------------------------------------------------------------|----------------------------|
| <b>Title and abstract</b> | 1       | (a) Indicate the study's design with a commonly used term in the title or the abstract                                                                                               | Line 1-3                   |
|                           |         | (b) Provide in the abstract an informative and balanced summary of what was done and what was found                                                                                  | Line 93-118                |
| <b>Introduction</b>       |         |                                                                                                                                                                                      |                            |
| Background/rationale      | 2       | Explain the scientific background and rationale for the investigation being reported                                                                                                 | Line 180-218               |
| Objectives                | 3       | State specific objectives, including any prespecified hypotheses                                                                                                                     | Line 215-218               |
| <b>Methods</b>            |         |                                                                                                                                                                                      |                            |
| Study design              | 4       | Present key elements of study design early in the paper                                                                                                                              | Line 223                   |
| Setting                   | 5       | Describe the setting, locations, and relevant dates, including periods of recruitment, exposure, follow-up, and data collection                                                      | Line 223-230               |
| Participants              | 6       | (a) Give the eligibility criteria, and the sources and methods of selection of participants                                                                                          | Line 232-241               |
| Variables                 | 7       | Clearly define all outcomes, exposures, predictors, potential confounders, and effect modifiers. Give diagnostic criteria, if applicable                                             | Line 255-258, Line 278-282 |
| Data sources/measurement  | 8*      | For each variable of interest, give sources of data and details of methods of assessment (measurement). Describe comparability of assessment methods if there is more than one group |                            |
| Bias                      | 9       | Describe any efforts to address potential sources of bias                                                                                                                            |                            |
| Study size                | 10      | Explain how the study size was arrived at                                                                                                                                            | Line 243-245               |
| Quantitative variables    | 11      | Explain how quantitative variables were handled in the analyses. If applicable, describe which groupings were chosen and why                                                         | Line 304-311               |
| Statistical methods       | 12      | (a) Describe all statistical methods, including those used to control for confounding                                                                                                | Line 304-321               |
|                           |         | (b) Describe any methods used to examine subgroups and interactions                                                                                                                  | NA                         |
|                           |         | (c) Explain how missing data were addressed                                                                                                                                          |                            |
|                           |         | (d) If applicable, describe analytical methods taking account of sampling strategy                                                                                                   | Line 310-311 appendix p5   |
|                           |         | (e) Describe any sensitivity analyses                                                                                                                                                | Line 283-284               |
| <b>Results</b>            |         |                                                                                                                                                                                      |                            |
| Participants              | 13*     | (a) Report numbers of individuals at each stage of study—eg numbers potentially eligible,                                                                                            | Line 335-347               |

|                          |     |                                                                                                                                                                                                              |                                                  |
|--------------------------|-----|--------------------------------------------------------------------------------------------------------------------------------------------------------------------------------------------------------------|--------------------------------------------------|
|                          |     | examined for eligibility, confirmed eligible, included in the study, completing follow-up, and analysed                                                                                                      |                                                  |
|                          |     | (b) Give reasons for non-participation at each stage                                                                                                                                                         | Line 335-347                                     |
|                          |     | (c) Consider use of a flow diagram                                                                                                                                                                           | Figure 1 and Appendix figure 2                   |
| Descriptive data         | 14* | (a) Give characteristics of study participants (eg demographic, clinical, social) and information on exposures and potential confounders                                                                     | Line 351-359<br>Table 1 and Tables 2&3           |
|                          |     | (b) Indicate number of participants with missing data for each variable of interest                                                                                                                          | Table 1 and Tables 2&3                           |
| Outcome data             | 15* | Report numbers of outcome events or summary measures                                                                                                                                                         | NA                                               |
| Main results             | 16  | (a) Give unadjusted estimates and, if applicable, confounder-adjusted estimates and their precision (eg, 95% confidence interval). Make clear which confounders were adjusted for and why they were included | Line 373-402<br>Table 2,<br>Appendix tables 4-10 |
|                          |     | (b) Report category boundaries when continuous variables were categorized                                                                                                                                    | Line 279-281                                     |
|                          |     | (c) If relevant, consider translating estimates of relative risk into absolute risk for a meaningful time period                                                                                             |                                                  |
| Other analyses           | 17  | Report other analyses done—eg analyses of subgroups and interactions, and sensitivity analyses                                                                                                               | Appendix table 10                                |
| <b>Discussion</b>        |     |                                                                                                                                                                                                              |                                                  |
| Key results              | 18  | Summarise key results with reference to study objectives                                                                                                                                                     | Line 434-439                                     |
| Limitations              | 19  | Discuss limitations of the study, taking into account sources of potential bias or imprecision. Discuss both direction and magnitude of any potential bias                                                   | Line 514-525                                     |
| Interpretation           | 20  | Give a cautious overall interpretation of results considering objectives, limitations, multiplicity of analyses, results from similar studies, and other relevant evidence                                   | Line 445-503                                     |
| Generalisability         | 21  | Discuss the generalisability (external validity) of the study results                                                                                                                                        | Line 514-516                                     |
| <b>Other information</b> |     |                                                                                                                                                                                                              |                                                  |
| Funding                  | 22  | Give the source of funding and the role of the funders for the present study and, if applicable, for the original study on which the present article is based                                                | Line 325-330                                     |

\*Give information separately for exposed and unexposed groups.
